# Supplementary material for: Screening and property targeting of thermochemical energy storage materials in concentrated solar power using thermodynamics-based insights and mathematical optimization
Source: Royal Society of Chemistry journal article supplement (doi:10.1039/d3su00244f), 2024-01-01
Supplement: d3su00244f1.pdf [file d3su00244f1.pdf]

## ***Electronic Supplementary Information***

# **Screening and Property Targeting of Thermochemical Energy Storage Materials in Concentrated Solar Power using Thermodynamics-based Insights and Mathematical Optimization**

*Ishan Bajaj<sup>1,2</sup>, Xinyue Peng<sup>3</sup>, Christos T. Maravelias<sup>2,4</sup>*

*<sup>1</sup>Department of Chemical Engineering, Indian Institute of Technology Kanpur, Kanpur, Uttar Pradesh, India*

*<sup>2</sup>Andlinger Center for Energy and the Environment, Princeton University, Princeton, New Jersey, USA*

*<sup>3</sup>Department of Chemical and Biological Engineering, University of Wisconsin-Madison, Wisconsin, USA*

*<sup>4</sup>Department of Chemical and Biological Engineering, Princeton University, Princeton, New Jersey, USA*

## S1 Reaction list and comparison of properties

Table S1 lists the reactions generated based on stoichiometry. For each of the reactions, equilibrium temperature ( $T^{eq}$ ) is estimated:

$$T^{eq} = -\frac{\Delta G^r}{R \log p_c^{v_c}}$$

where  $\Delta G^r$ ,  $R$ ,  $p_c$ ,  $v_c$  are the Gibbs energy of reaction, universal gas constant, partial pressure of gas C, and stoichiometry coefficient, respectively. Partial pressure of gas C in oxide reactions is fixed to 0.21, whereas it is taken to be 1 bar for hydroxide and carbonate reaction systems. Reaction enthalpy ( $\Delta H^r$ ) is also reported and estimated at  $T^{eq}$ .

Table S1. List of reaction considered and their estimated properties.

| No. | Reactions                                    | $T^{eq}$ (K) | $\Delta H^r$ (kJ/mol) |
|-----|----------------------------------------------|--------------|-----------------------|
| 1   | $Mn_2O_3 <--> 0.66667 Mn_3O_4 + 0.16667 O_2$ | 1174.1       | 32.136                |
| 2   | $Mn_2O_3 <--> 2 MnO + 0.5 O_2$               | 1646.7       | 173.85                |
| 3   | $MnO_2 <--> 0.5 Mn_2O_3 + 0.25 O_2$          | 717.69       | 39.764                |
| 4   | $Mn_3O_4 <--> 3 MnO + 0.5 O_2$               | 1846.2       | 196.46                |
| 5   | $MnO_2 <--> 0.33333 Mn_3O_4 + 0.33333 O_2$   | 809.44       | 56.15                 |
| 6   | $V_2O_5 <--> V_2O_4 + 0.5 O_2$               | 1835.4       | 174.72                |
| 7   | $V_2O_5 <--> V_2O_3 + O_2$                   | 2405.1       | 384.59                |
| 8   | $V_2O_5 <--> 2 VO_2 + 0.5 O_2$               | 2714.6       | 886.8                 |
| 9   | $V_2O_5 <--> 2 VO + 1.5 O_2$                 | 2945         | 717.73                |
| 10  | $V_2O_4 <--> V_2O_3 + 0.5 O_2$               | 3680.7       | 139.68                |
| 11  | $V_2O_4 <--> 2 VO + O_2$                     | 3909.6       | 451.06                |
| 12  | $BaO_2 <--> BaO + 0.5 O_2$                   | 1015.3       | 80.479                |
| 13  | $CuO <--> 0.5 Cu_2O + 0.25 O_2$              | 1304.9       | 64.907                |
| 14  | $Fe_2O_3 <--> 0.66667 Fe_3O_4 + 0.16667 O_2$ | 1613.1       | 77.754                |
| 15  | $Fe_2O_3 <--> 2 FeO + 0.5 O_2$               | 2011.9       | 319.48                |
| 16  | $Fe_3O_4 <--> 3 FeO + 0.5 O_2$               | 2431.4       | 229.07                |
| 17  | $SrO_2 <--> SrO + 0.5 O_2$                   | 393.51       | 40.425                |
| 18  | $MnO_2 <--> MnO + 0.5 O_2$                   | 1178.7       | 131.17                |
| 19  | $RhO_2 <--> 0.5 Rh_2O_3 + 0.25 O_2$          | 38.006       | -19.778               |
| 20  | $Li_2O_2 <--> Li_2O + 0.5 O_2$               | 374.75       | 33.702                |
| 21  | $LiO <--> 0.5 Li_2O + 0.25 O_2$              | 3413         | -298.33               |
| 22  | $CrO_3 <--> 0.5 Cr_2O_3 + 0.75 O_2$          | 149.23       | 19.338                |
| 23  | $CrO_2 <--> 0.5 Cr_2O_3 + 0.25 O_2$          | 73163        | 1.03E+05              |
| 24  | $Cr_2O_3 <--> 2 CrO + 0.5 O_2$               | 3483.2       | 1240.3                |
| 25  | $PbO_2 <--> PbO + 0.5 O_2$                   | 532.88       | 54.465                |
| 26  | $PbO_2 <--> 0.33333 Pb_3O_4 + 0.33333 O_2$   | 487.73       | 34.855                |
| 27  | $Sb_2O_5 <--> Sb_2O_4 + 0.5 O_2$             | 570.22       | 67.489                |

|    |                                                                                    |        |         |
|----|------------------------------------------------------------------------------------|--------|---------|
| 28 | $\text{Sb}_2\text{O}_5 < \text{---} > 2 \text{SbO} + 1.5 \text{O}_2$               | 1139.1 | 755.25  |
| 29 | $\text{Sb}_2\text{O}_5 < \text{---} > \text{Sb}_2\text{O}_3 + \text{O}_2$          | 1095.7 | 341.34  |
| 30 | $\text{Sb}_2\text{O}_5 < \text{---} > 0.5 \text{Sb}_4\text{O}_6 + \text{O}_2$      | 1143.1 | 371.04  |
| 31 | $\text{Pb}_3\text{O}_4 < \text{---} > 3 \text{PbO} + 0.5 \text{O}_2$               | 638.72 | 57.949  |
| 32 | $\text{Sb}_2\text{O}_4 < \text{---} > 2 \text{SbO} + \text{O}_2$                   | 1271.7 | 675.31  |
| 33 | $\text{Sb}_2\text{O}_4 < \text{---} > \text{Sb}_2\text{O}_3 + 0.5 \text{O}_2$      | 1441.4 | 277.85  |
| 34 | $\text{Sb}_2\text{O}_4 < \text{---} > 0.5 \text{Sb}_4\text{O}_6 + 0.5 \text{O}_2$  | 1508.7 | 292.71  |
|    | $\text{UO}_3 < \text{---} > 0.33333 \text{U}_3\text{O}_8$                          |        |         |
| 35 | $\quad\quad\quad + 0.16667 \text{O}_2$                                             | 860.96 | 34.881  |
| 36 | $\text{UO}_3 < \text{---} > 0.25 \text{U}_4\text{O}_9 + 0.375 \text{O}_2$          | 1340.3 | 98.232  |
| 37 | $\text{UO}_3 < \text{---} > \text{UO}_2 + 0.5 \text{O}_2$                          | 1544.4 | 139.18  |
| 38 | $\text{U}_3\text{O}_8 < \text{---} > 0.75 \text{U}_4\text{O}_9 + 0.625 \text{O}_2$ | 2066.7 | 180.41  |
| 39 | $\text{U}_3\text{O}_8 < \text{---} > 3 \text{UO}_2 + \text{O}_2$                   | 2260.8 | 278.36  |
| 40 | $\text{Na}_2\text{O}_2 < \text{---} > \text{Na}_2\text{O} + 0.5 \text{O}_2$        | 1141.2 | 87.077  |
| 41 | $\text{NaO}_2 < \text{---} > 0.5 \text{Na}_2\text{O} + 0.75 \text{O}_2$            | 632.37 | 46.146  |
| 42 | $\text{NaO} < \text{---} > 0.5 \text{Na}_2\text{O} + 0.25 \text{O}_2$              | 2770   | -213.11 |
| 43 | $\text{NaO}_2 < \text{---} > 0.5 \text{Na}_2\text{O}_2 + 0.5 \text{O}_2$           | 120.96 | 5.9705  |
| 44 | $\text{NaO}_2 < \text{---} > \text{NaO} + 0.5 \text{O}_2$                          | 1817.3 | 270.81  |
| 45 | $\text{AlO}_2 < \text{---} > 0.5 \text{Al}_2\text{O}_3 + 0.25 \text{O}_2$          | 5064.2 | -449.07 |
| 46 | $\text{AlO}_2 < \text{---} > 0.5 \text{Al}_2\text{O}_2 + 0.5 \text{O}_2$           | 24.604 | 73.764  |
| 47 | $\text{AlO}_2 < \text{---} > 0.5 \text{Al}_2\text{O} + 0.75 \text{O}_2$            | 2906.8 | 114.71  |
| 48 | $\text{Al}_2\text{O}_3 < \text{---} > \text{Al}_2\text{O}_2 + 0.5 \text{O}_2$      | 4875.1 | 843.8   |
| 49 | $\text{Al}_2\text{O}_3 < \text{---} > \text{Al}_2\text{O} + \text{O}_2$            | 4417.4 | 1182.6  |
| 50 | $\text{Al}_2\text{O}_2 < \text{---} > \text{Al}_2\text{O} + 0.5 \text{O}_2$        | 3474   | 299.25  |
| 51 | $\text{SiO}_2 < \text{---} > \text{SiO} + 0.5 \text{O}_2$                          | 3184.2 | 735.54  |
| 52 | $\text{Co}_3\text{O}_4 < \text{---} > 3 \text{CoO} + 0.5 \text{O}_2$               | 1166.1 | 197.78  |
| 53 | $\text{CrO}_3 < \text{---} > \text{CrO}_2 + 0.5 \text{O}_2$                        | 7.7802 | 154.61  |
| 54 | $\text{CrO}_3 < \text{---} > \text{CrO} + \text{O}_2$                              | 2547.1 | 651.31  |
| 55 | $\text{KO}_2 < \text{---} > 0.5 \text{K}_2\text{O}_2 + 0.5 \text{O}_2$             | 1158.8 | 22.337  |
| 56 | $\text{K}_2\text{O}_2 < \text{---} > \text{K}_2\text{O} + 0.5 \text{O}_2$          | 1343.7 | 167.17  |
| 57 | $\text{KO}_2 < \text{---} > \text{KO} + 0.5 \text{O}_2$                            | 1871.2 | 300.17  |
| 58 | $\text{KO}_2 < \text{---} > 0.5 \text{K}_2\text{O} + 0.75 \text{O}_2$              | 1304   | 96.809  |
| 59 | $\text{KO} < \text{---} > 0.5 \text{K}_2\text{O} + 0.25 \text{O}_2$                | 2345.2 | -196.81 |
| 60 | $\text{CaO}_2 < \text{---} > \text{CaO} + 0.5 \text{O}_2$                          | 277.86 | 18.128  |
| 61 | $\text{TiO}_2 < \text{---} > 0.5 \text{Ti}_2\text{O}_3 + 0.25 \text{O}_2$          | 3864.6 | 161.3   |
| 62 | $\text{Ti}_2\text{O}_3 < \text{---} > 2 \text{TiO} + 0.5 \text{O}_2$               | 5120.6 | 407.32  |
| 63 | $\text{Ti}_3\text{O}_5 < \text{---} > 1.5 \text{Ti}_2\text{O}_3 + 0.25 \text{O}_2$ | 26855  | 1477.6  |
| 64 | $\text{Ti}_4\text{O}_7 < \text{---} > 2 \text{Ti}_2\text{O}_3 + 0.5 \text{O}_2$    | 6042.6 | 230.33  |
| 65 | $\text{TiO}_2 < \text{---} > \text{TiO} + 0.5 \text{O}_2$                          | 4484.6 | 358.38  |
|    | $\text{TiO}_2 < \text{---} > 0.33333 \text{Ti}_3\text{O}_5$                        |        |         |
| 66 | $\quad\quad\quad + 0.16667 \text{O}_2$                                             | 3152.6 | 123.72  |
| 67 | $\text{TiO}_2 < \text{---} > 0.25 \text{Ti}_4\text{O}_7 + 0.125 \text{O}_2$        | 3018.8 | 88.533  |
| 68 | $\text{Ti}_3\text{O}_5 < \text{---} > 3 \text{TiO} + \text{O}_2$                   | 5728.7 | 691.21  |
| 69 | $\text{Ti}_4\text{O}_7 < \text{---} > 4 \text{TiO} + 1.5 \text{O}_2$               | 5306.5 | 1068.3  |

|     |                                                                                               |        |          |
|-----|-----------------------------------------------------------------------------------------------|--------|----------|
| 70  | $\text{Ti}_4\text{O}_7 < \text{---} > 1.3333 \text{Ti}_3\text{O}_5$<br>$+ 0.16667 \text{O}_2$ | 3544.2 | 140.81   |
| 71  | $\text{VO}_2 < \text{---} > 0.5 \text{V}_2\text{O}_3 + 0.25 \text{O}_2$                       | 3019.1 | -241.06  |
| 72  | $\text{V}_2\text{O}_3 < \text{---} > 2 \text{VO} + 0.5 \text{O}_2$                            | 4015.8 | 318.46   |
| 73  | $\text{VO}_2 < \text{---} > \text{VO} + 0.5 \text{O}_2$                                       | 2080.8 | -99.259  |
| 74  | $\text{CrO}_2 < \text{---} > \text{CrO} + 0.5 \text{O}_2$                                     | 3970.1 | 510.35   |
| 75  | $\text{GaO} < \text{---} > 0.5 \text{Ga}_2\text{O} + 0.25 \text{O}_2$                         | 4079.2 | -222.39  |
| 76  | $\text{Ga}_2\text{O}_3 < \text{---} > \text{Ga}_2\text{O} + \text{O}_2$                       | 2720.3 | 762.97   |
| 77  | $\text{Ga}_2\text{O}_3 < \text{---} > 2 \text{GaO} + 0.5 \text{O}_2$                          | 3105.2 | 1166.1   |
| 78  | $\text{GeO}_2 < \text{---} > \text{GeO} + 0.5 \text{O}_2$                                     | 1988.5 | 463.65   |
| 79  | $\text{As}_2\text{O}_3 < \text{---} > 2 \text{AsO} + 0.5 \text{O}_2$                          | 9.1384 | 246      |
| 80  | $\text{As}_2\text{O}_5 < \text{---} > 2 \text{AsO} + 1.5 \text{O}_2$                          | 1230.3 | 752.14   |
| 81  | $\text{As}_4\text{O}_6 < \text{---} > 4 \text{AsO} + \text{O}_2$                              | 1366.7 | 925.76   |
| 82  | $\text{As}_2\text{O}_5 < \text{---} > \text{As}_2\text{O}_3 + \text{O}_2$                     | 90782  | 9.90E+05 |
| 83  | $\text{As}_2\text{O}_5 < \text{---} > 0.5 \text{As}_4\text{O}_6 + \text{O}_2$                 | 1062.5 | 299.57   |
| 84  | $\text{SeO}_2 < \text{---} > \text{SeO} + 0.5 \text{O}_2$                                     | 1093.4 | 261.16   |
| 85  | $\text{RbO}_2 < \text{---} > 0.5 \text{Rb}_2\text{O} + 0.75 \text{O}_2$                       | 1411.3 | 78.472   |
| 86  | $\text{ZrO}_2 < \text{---} > \text{ZrO} + 0.5 \text{O}_2$                                     | 4674   | 1023.9   |
| 87  | $\text{Nb}_2\text{O}_5 < \text{---} > 2 \text{NbO}_2 + 0.5 \text{O}_2$                        | 3654   | 331.03   |
| 88  | $\text{Nb}_2\text{O}_5 < \text{---} > 2 \text{NbO} + 1.5 \text{O}_2$                          | 4333.3 | 953.56   |
| 89  | $\text{NbO}_2 < \text{---} > \text{NbO} + 0.5 \text{O}_2$                                     | 4777.5 | 317.97   |
| 90  | $\text{MoO}_2 < \text{---} > \text{MoO} + 0.5 \text{O}_2$                                     | 3376.8 | 737.47   |
| 91  | $\text{MoO}_3 < \text{---} > \text{MoO}_2 + 0.5 \text{O}_2$                                   | 4103.4 | 218.94   |
| 92  | $\text{MoO}_3 < \text{---} > \text{MoO} + \text{O}_2$                                         | 3496.9 | 865.24   |
| 93  | $\text{Tc}_2\text{O}_7 < \text{---} > 2 \text{TcO}_2 + 1.5 \text{O}_2$                        | 995.25 | 158.82   |
| 94  | $\text{Tc}_2\text{O}_7 < \text{---} > 2 \text{TcO}_3 + 0.5 \text{O}_2$                        | 393    | 34.149   |
| 95  | $\text{TcO}_3 < \text{---} > \text{TcO}_2 + 0.5 \text{O}_2$                                   | 1227   | 42.06    |
| 96  | $\text{RuO}_4 < \text{---} > \text{RuO}_2 + \text{O}_2$                                       | 10.621 | 275.75   |
| 97  | $\text{RuO}_3 < \text{---} > \text{RuO}_2 + 0.5 \text{O}_2$                                   | 2970.7 | -139.11  |
| 98  | $\text{RuO}_4 < \text{---} > \text{RuO}_3 + 0.5 \text{O}_2$                                   | 1155.8 | 100.99   |
| 99  | $\text{In}_2\text{O}_3 < \text{---} > \text{In}_2\text{O} + \text{O}_2$                       | 2300.2 | 784.9    |
| 100 | $\text{SnO}_2 < \text{---} > \text{SnO} + 0.5 \text{O}_2$                                     | 2633.7 | 285.79   |
| 101 | $\text{Sb}_2\text{O}_3 < \text{---} > 2 \text{SbO} + 0.5 \text{O}_2$                          | 1177.9 | 409.1    |
| 102 | $\text{Sb}_4\text{O}_6 < \text{---} > 4 \text{SbO} + \text{O}_2$                              | 1135.2 | 768.69   |
| 103 | $\text{CeO}_2 < \text{---} > \text{CeO} + 0.5 \text{O}_2$                                     | 3915.9 | 771.64   |
| 104 | $\text{PrO}_2 < \text{---} > 0.14286 \text{Pr}_7\text{O}_{12}$<br>$+ 0.14286 \text{O}_2$      | 690.92 | 13.759   |
| 105 | $\text{Pr}_7\text{O}_{12} < \text{---} > 3.5 \text{Pr}_2\text{O}_3 + 0.75 \text{O}_2$         | 1131.4 | 186.46   |
| 106 | $\text{PrO}_2 < \text{---} > 0.5 \text{Pr}_2\text{O}_3 + 0.25 \text{O}_2$                     | 947.26 | 35.203   |
| 107 | $\text{CsO}_2 < \text{---} > 0.5 \text{Cs}_2\text{O} + 0.75 \text{O}_2$                       | 1452.7 | 85.226   |
| 108 | $\text{La}_2\text{O}_3 < \text{---} > 2 \text{LaO} + 0.5 \text{O}_2$                          | 4106.9 | 1274.2   |
| 109 | $\text{TbO}_2 < \text{---} > 0.5 \text{Tb}_2\text{O}_3 + 0.25 \text{O}_2$                     | 765.24 | 39.378   |
| 110 | $\text{TbO}_{1.72} < \text{---} > 0.5 \text{Tb}_2\text{O}_3 + 0.11 \text{O}_2$                | 931.21 | 20.02    |
| 111 | $\text{TbO}_{1.81} < \text{---} > 0.5 \text{Tb}_2\text{O}_3 + 0.155 \text{O}_2$               | 928.46 | 28.928   |
| 112 | $\text{TbO}_2 < \text{---} > \text{TbO}_{1.72} + 0.14 \text{O}_2$                             | 641.59 | 18.716   |
| 113 | $\text{TbO}_2 < \text{---} > \text{TbO}_{1.81} + 0.095 \text{O}_2$                            | 504.15 | 9.7468   |
| 114 | $\text{TbO}_{1.81} < \text{---} > \text{TbO}_{1.72} + 0.045 \text{O}_2$                       | 922.33 | 8.8912   |
| 115 | $\text{ThO}_2 < \text{---} > \text{ThO} + 0.5 \text{O}_2$                                     | 4991   | 1046.7   |

|     |                                         |         |          |
|-----|-----------------------------------------|---------|----------|
| 116 | $U_4O_9 <--> 4 UO_2 + 0.5 O_2$          | 2856.5  | 101.48   |
| 117 | $PuO_2 <--> 0.5 Pu_2O_3 + 0.25 O_2$     | 2220.4  | 163.99   |
| 118 | $Pu_2O_3 <--> 2 PuO + 0.5 O_2$          | 9.4951  | -1333.5  |
| 119 | $PuO_2 <--> PuO + 0.5 O_2$              | 6713.8  | 372.18   |
| 120 | $Ta_2O_5 <--> 2 TaO_2 + 0.5 O_2$        | 4030.8  | 1222.4   |
| 121 | $Ta_2O_5 <--> 2 TaO + 1.5 O_2$          | 4518.8  | 2004.3   |
| 122 | $TaO_2 <--> TaO + 0.5 O_2$              | 5459.3  | 430.12   |
|     | $W_2O_6 <--> 0.66667 W_3O_8$            |         |          |
| 123 | $+ 0.33333 O_2$                         | 36.217  | -64.501  |
| 124 | $W_2O_6 <--> 2 WO_{2.72} + 0.28 O_2$    | 1905.9  | -363.04  |
| 125 | $W_2O_6 <--> 2 WO_{2.9} + 0.1 O_2$      | 2023.9  | -433.11  |
| 126 | $W_2O_6 <--> 2 WO_{2.96} + 0.04 O_2$    | 2073.2  | -459.17  |
| 127 | $W_2O_6 <--> 2 WO_2 + O_2$              | 153.92  | -13.651  |
| 128 | $W_2O_6 <--> 2 WO + 2 O_2$              | 4505    | 1890.9   |
|     | $W_4O_{12} <--> 1.3333 W_3O_8$          |         |          |
| 129 | $+ 0.66667 O_2$                         | 2956.7  | 485.6    |
| 130 | $W_4O_{12} <--> 4 WO_{2.72} + 0.56 O_2$ | 1563.1  | -291.88  |
| 131 | $W_4O_{12} <--> 4 WO_{2.9} + 0.2 O_2$   | 1857.1  | -424.83  |
| 132 | $W_4O_{12} <--> 4 WO_{2.96} + 0.08 O_2$ | 1958.5  | -474.52  |
| 133 | $W_4O_{12} <--> 4 WO_2 + 2 O_2$         | 3233    | 328.4    |
| 134 | $W_4O_{12} <--> 4 WO + 4 O_2$           | 4066.2  | 4216.5   |
| 135 | $W_3O_9 <--> W_3O_8 + 0.5 O_2$          | 3512.9  | 294.63   |
| 136 | $W_3O_9 <--> 3 WO_{2.72} + 0.42 O_2$    | 1610.1  | -289.73  |
| 137 | $W_3O_9 <--> 3 WO_{2.9} + 0.15 O_2$     | 1840.5  | -391.21  |
| 138 | $W_3O_9 <--> 3 WO_{2.96} + 0.06 O_2$    | 1924.3  | -429.16  |
| 139 | $W_3O_9 <--> 3 WO_2 + 1.5 O_2$          | -1443.2 | 426.06   |
| 140 | $W_3O_9 <--> 3 WO + 3 O_2$              | 4186.2  | 3096     |
|     | $WO_{2.72} <--> 0.33333 W_3O_8$         |         |          |
| 141 | $+ 0.026667 O_2$                        | 2242.1  | 184.77   |
|     | $WO_{2.9} <--> 0.33333 W_3O_8$          |         |          |
| 142 | $+ 0.11667 O_2$                         | 2329.6  | 220.21   |
|     | $WO_{2.96} <--> 0.33333 W_3O_8$         |         |          |
| 143 | $+ 0.14667 O_2$                         | 2371.8  | 233.18   |
| 144 | $W_3O_8 <--> 3 WO_2 + O_2$              | 474.07  | -59.706  |
| 145 | $W_3O_8 <--> 3 WO + 2.5 O_2$            | 4271.8  | 2801.6   |
|     | $WO_3 <--> 0.33333 W_3O_8$              |         |          |
| 146 | $+ 0.16667 O_2$                         | 2939.6  | 135.05   |
| 147 | $WO_{2.9} <--> WO_{2.72} + 0.09 O_2$    | 2875.1  | 37.887   |
| 148 | $WO_{2.96} <--> WO_{2.72} + 0.12 O_2$   | 2982    | 51.835   |
| 149 | $WO_{2.72} <--> WO_2 + 0.36 O_2$        | 15.558  | -406.57  |
| 150 | $WO_{2.72} <--> WO + 0.86 O_2$          | 3760.5  | 1072.2   |
| 151 | $WO_3 <--> WO_{2.72} + 0.14 O_2$        | 15276   | 893.93   |
| 152 | $WO_{2.96} <--> WO_{2.9} + 0.03 O_2$    | 3320.5  | 13.78    |
| 153 | $WO_{2.9} <--> WO_2 + 0.45 O_2$         | 14.222  | -481.31  |
| 154 | $WO_{2.9} <--> WO + 0.95 O_2$           | 3721.1  | 1113.1   |
| 155 | $WO_3 <--> WO_{2.9} + 0.05 O_2$         | 19116   | 1408.6   |
| 156 | $WO_{2.96} <--> WO_2 + 0.48 O_2$        | 3709.7  | -0.41559 |
| 157 | $WO_{2.96} <--> WO + 0.98 O_2$          | 3715.6  | 1127     |

|     |                                                                       |         |          |
|-----|-----------------------------------------------------------------------|---------|----------|
| 160 | $\text{WO}_3 < \text{---}> \text{WO}_{2.96} + 0.02 \text{O}_2$        | 20129   | 1549     |
| 161 | $\text{WO}_2 < \text{---}> \text{WO} + 0.5 \text{O}_2$                | 3715.4  | 1130.4   |
| 162 | $\text{WO}_3 < \text{---}> \text{WO}_2 + 0.5 \text{O}_2$              | 13.344  | -532.46  |
| 163 | $\text{WO}_3 < \text{---}> \text{WO} + \text{O}_2$                    | 4069.5  | 1026.6   |
| 164 | $\text{ReO}_3 < \text{---}> \text{ReO}_2 + 0.5 \text{O}_2$            | 1775.3  | 124.29   |
| 165 | $\text{Re}_2\text{O}_7 < \text{---}> 2 \text{ReO}_3 + 0.5 \text{O}_2$ | 37.466  | -225.19  |
| 166 | $\text{Re}_2\text{O}_7 < \text{---}> 2 \text{ReO}_2 + 1.5 \text{O}_2$ | 7842.2  | 527.61   |
| 167 | $\text{Mn}_2\text{O}_3 < \text{---}> 2 \text{Mn} + 1.5 \text{O}_2$    | 3450.2  | 902.63   |
| 168 | $\text{Mn}_3\text{O}_4 < \text{---}> 3 \text{Mn} + 2 \text{O}_2$      | 3641.1  | 1421.1   |
| 169 | $\text{V}_2\text{O}_5 < \text{---}> 2 \text{V} + 2.5 \text{O}_2$      | 4028.1  | 1463.3   |
| 170 | $\text{V}_2\text{O}_4 < \text{---}> 2 \text{V} + 2 \text{O}_2$        | 5116.8  | 1146.3   |
| 171 | $\text{BaO}_2 < \text{---}> \text{Ba} + \text{O}_2$                   | 47372   | 61591    |
| 172 | $\text{BaO} < \text{---}> \text{Ba} + 0.5 \text{O}_2$                 | -1949.6 | 985.31   |
| 173 | $\text{Cu}_2\text{O} < \text{---}> 2 \text{Cu} + 0.5 \text{O}_2$      | 2477.6  | 110.2    |
| 174 | $\text{CuO} < \text{---}> \text{Cu} + 0.5 \text{O}_2$                 | 1647    | 157.89   |
| 175 | $\text{Fe}_2\text{O}_3 < \text{---}> 2 \text{Fe} + 1.5 \text{O}_2$    | 2945.3  | 920.67   |
| 176 | $\text{Fe}_3\text{O}_4 < \text{---}> 3 \text{Fe} + 2 \text{O}_2$      | 3633.8  | 996.77   |
| 177 | $\text{SrO} < \text{---}> \text{Sr} + 0.5 \text{O}_2$                 | 6639.3  | 465.98   |
| 178 | $\text{MnO} < \text{---}> \text{Mn} + 0.5 \text{O}_2$                 | 4849.7  | 377.29   |
| 179 | $\text{Rh}_2\text{O}_3 < \text{---}> 2 \text{Rh} + 1.5 \text{O}_2$    | 1304.3  | 332.07   |
| 180 | $\text{RhO}_2 < \text{---}> \text{Rh} + \text{O}_2$                   | -1665.7 | 352.25   |
| 181 | $\text{Li}_2\text{O}_2 < \text{---}> 2 \text{Li} + \text{O}_2$        | 91553   | 1.03E+06 |
| 182 | $\text{Li}_2\text{O} < \text{---}> 2 \text{Li} + 0.5 \text{O}_2$      | 10.55   | -1219.2  |
| 183 | $\text{Cr}_2\text{O}_3 < \text{---}> 2 \text{Cr} + 1.5 \text{O}_2$    | 4374.6  | 1003.3   |
| 184 | $\text{PbO}_2 < \text{---}> \text{Pb} + \text{O}_2$                   | 1322.6  | 265.29   |
| 185 | $\text{Sb}_2\text{O}_5 < \text{---}> 2 \text{Sb} + 2.5 \text{O}_2$    | 1806    | 1028.1   |
| 186 | $\text{PbO} < \text{---}> \text{Pb} + 0.5 \text{O}_2$                 | 20.531  | -520.99  |
| 187 | $\text{Sb}_2\text{O}_4 < \text{---}> 2 \text{Sb} + 2 \text{O}_2$      | 2180.7  | 933.33   |
| 188 | $\text{UO}_3 < \text{---}> \text{U} + 1.5 \text{O}_2$                 | 4461.9  | 1195     |
| 189 | $\text{U}_3\text{O}_8 < \text{---}> 3 \text{U} + 4 \text{O}_2$        | 5458.1  | 3136.7   |
| 190 | $\text{Na}_2\text{O} < \text{---}> 2 \text{Na} + 0.5 \text{O}_2$      | 3760.6  | 444.23   |
| 191 | $\text{Na}_2\text{O}_2 < \text{---}> 2 \text{Na} + \text{O}_2$        | 2353    | 496.77   |
| 192 | $\text{NaO}_2 < \text{---}> \text{Na} + \text{O}_2$                   | 1957.5  | 197.2    |
| 193 | $\text{AlO}_2 < \text{---}> \text{Al} + \text{O}_2$                   | 7513.1  | 275.08   |
| 194 | $\text{Al}_2\text{O}_3 < \text{---}> 2 \text{Al} + 1.5 \text{O}_2$    | 5767.5  | 1331     |
| 195 | $\text{Al}_2\text{O}_2 < \text{---}> 2 \text{Al} + \text{O}_2$        | 7701.1  | 618.06   |
| 196 | $\text{Al}_2\text{O} < \text{---}> 2 \text{Al} + 0.5 \text{O}_2$      | -699.32 | 216.84   |
| 197 | $\text{SiO}_2 < \text{---}> \text{Si} + \text{O}_2$                   | 4680.5  | 884.81   |
| 198 | $\text{SiO} < \text{---}> \text{Si} + 0.5 \text{O}_2$                 | -1017.8 | 129.11   |
| 199 | $\text{CoO} < \text{---}> \text{Co} + 0.5 \text{O}_2$                 | 3336.5  | 190.79   |
| 200 | $\text{Co}_3\text{O}_4 < \text{---}> 3 \text{Co} + 2 \text{O}_2$      | 2299.9  | 821.2    |
| 201 | $\text{FeO} < \text{---}> \text{Fe} + 0.5 \text{O}_2$                 | 4296.4  | 250.45   |
| 202 | $\text{MnO}_2 < \text{---}> \text{Mn} + \text{O}_2$                   | 2632.5  | 529.49   |
| 203 | $\text{CrO}_3 < \text{---}> \text{Cr} + 1.5 \text{O}_2$               | 2775.3  | 514.5    |
| 204 | $\text{K}_2\text{O}_2 < \text{---}> 2 \text{K} + \text{O}_2$          | 1951.4  | 787.56   |
| 205 | $\text{KO}_2 < \text{---}> \text{K} + \text{O}_2$                     | 2038.1  | 251.82   |
| 206 | $\text{LiO} < \text{---}> \text{Li} + 0.5 \text{O}_2$                 | 1358.3  | -71.349  |
| 207 | $\text{NaO} < \text{---}> \text{Na} + 0.5 \text{O}_2$                 | 1498.3  | -69.871  |

|     |                                                                     |         |          |
|-----|---------------------------------------------------------------------|---------|----------|
| 208 | $\text{KO} < \text{---} > \text{K} + 0.5 \text{O}_2$                | 1358.6  | -58.286  |
| 209 | $\text{K}_2\text{O} < \text{---} > 2 \text{K} + 0.5 \text{O}_2$     | 2988.4  | 364.67   |
| 210 | $\text{CaO}_2 < \text{---} > \text{Ca} + \text{O}_2$                | 4367.3  | 599.98   |
| 211 | $\text{CaO} < \text{---} > \text{Ca} + 0.5 \text{O}_2$              | 6837.4  | 496.72   |
| 212 | $\text{Ti}_2\text{O}_3 < \text{---} > 2 \text{Ti} + 1.5 \text{O}_2$ | 6452.5  | 1296.2   |
| 213 | $\text{TiO}_2 < \text{---} > \text{Ti} + \text{O}_2$                | 5727    | 795.11   |
| 214 | $\text{TiO} < \text{---} > \text{Ti} + 0.5 \text{O}_2$              | 7330    | 438.19   |
| 215 | $\text{Ti}_3\text{O}_5 < \text{---} > 3 \text{Ti} + 2.5 \text{O}_2$ | 6693.9  | 1999.2   |
| 216 | $\text{V}_2\text{O}_3 < \text{---} > 2 \text{V} + 1.5 \text{O}_2$   | 5347.7  | 1055.6   |
| 217 | $\text{VO}_2 < \text{---} > \text{V} + \text{O}_2$                  | -2264.8 | 534.23   |
| 218 | $\text{VO} < \text{---} > \text{V} + 0.5 \text{O}_2$                | 6202.2  | 376.28   |
| 219 | $\text{CrO}_2 < \text{---} > \text{Cr} + \text{O}_2$                | 35037   | 14412    |
| 220 | $\text{CrO} < \text{---} > \text{Cr} + 0.5 \text{O}_2$              | 1962.8  | -161.07  |
| 221 | $\text{Ga}_2\text{O} < \text{---} > 2 \text{Ga} + 0.5 \text{O}_2$   | -241.37 | 156.66   |
| 222 | $\text{GaO} < \text{---} > \text{Ga} + 0.5 \text{O}_2$              | 2248.3  | -137.62  |
| 223 | $\text{Ga}_2\text{O}_3 < \text{---} > 2 \text{Ga} + 1.5 \text{O}_2$ | 25557   | 6876.9   |
| 224 | $\text{GeO}_2 < \text{---} > \text{Ge} + \text{O}_2$                | 2920.6  | 535.33   |
| 225 | $\text{GeO} < \text{---} > \text{Ge} + 0.5 \text{O}_2$              | -532.64 | 57.143   |
| 226 | $\text{AsO} < \text{---} > \text{As} + 0.5 \text{O}_2$              | -613.36 | 78.044   |
| 227 | $\text{As}_2\text{O}_3 < \text{---} > 2 \text{As} + 1.5 \text{O}_2$ | 38.653  | 40.797   |
| 228 | $\text{As}_2\text{O}_5 < \text{---} > 2 \text{As} + 2.5 \text{O}_2$ | 1942.7  | 849.73   |
| 229 | $\text{As}_4\text{O}_6 < \text{---} > 4 \text{As} + 3 \text{O}_2$   | 2670.2  | 2227.4   |
| 230 | $\text{SeO}_2 < \text{---} > \text{Se} + \text{O}_2$                | 1163.7  | 213.84   |
| 231 | $\text{SeO} < \text{---} > \text{Se} + 0.5 \text{O}_2$              | 855.19  | -48.541  |
| 232 | $\text{Rb}_2\text{O} < \text{---} > 2 \text{Rb} + 0.5 \text{O}_2$   | 2866.4  | 350.51   |
| 233 | $\text{RbO}_2 < \text{---} > \text{Rb} + \text{O}_2$                | 2172.7  | 220.9    |
| 234 | $\text{SrO}_2 < \text{---} > \text{Sr} + \text{O}_2$                | 4396.4  | 211.72   |
| 235 | $\text{ZrO}_2 < \text{---} > \text{Zr} + \text{O}_2$                | 5989.1  | 1005.1   |
| 236 | $\text{ZrO} < \text{---} > \text{Zr} + 0.5 \text{O}_2$              | 764.4   | -54.53   |
| 237 | $\text{Nb}_2\text{O}_5 < \text{---} > 2 \text{Nb} + 2.5 \text{O}_2$ | 4953.5  | 1566.1   |
| 238 | $\text{NbO}_2 < \text{---} > \text{Nb} + \text{O}_2$                | 5427.2  | 630.59   |
| 239 | $\text{NbO} < \text{---} > \text{Nb} + 0.5 \text{O}_2$              | 6277.6  | 312.95   |
| 240 | $\text{MoO}_2 < \text{---} > \text{MO} + \text{O}_2$                | 3323.4  | 520.95   |
| 241 | $\text{MoO} < \text{---} > \text{MO} + 0.5 \text{O}_2$              | 3509.4  | -219.06  |
| 242 | $\text{MoO}_3 < \text{---} > \text{MO} + 1.5 \text{O}_2$            | 3492.6  | 646.02   |
| 243 | $\text{Tc}_2\text{O}_7 < \text{---} > 2 \text{Tc} + 3.5 \text{O}_2$ | 1950.5  | 954.38   |
| 244 | $\text{TcO}_2 < \text{---} > \text{Tc} + \text{O}_2$                | 2357.8  | 404.38   |
| 245 | $\text{TcO}_3 < \text{---} > \text{Tc} + 1.5 \text{O}_2$            | 72753   | 5.81E+05 |
| 246 | $\text{RuO}_2 < \text{---} > \text{Ru} + \text{O}_2$                | 1797.7  | 268.37   |
| 247 | $\text{RuO}_4 < \text{---} > \text{Ru} + 2 \text{O}_2$              | 1070.6  | 179.7    |
| 248 | $\text{RuO}_3 < \text{---} > \text{Ru} + 1.5 \text{O}_2$            | 977.36  | 78.112   |
| 249 | $\text{In}_2\text{O} < \text{---} > 2 \text{In} + 0.5 \text{O}_2$   | -383.31 | 121.89   |
| 250 | $\text{In}_2\text{O}_3 < \text{---} > 2 \text{In} + 1.5 \text{O}_2$ | 4498.1  | 574.09   |
| 251 | $\text{SnO}_2 < \text{---} > \text{Sn} + \text{O}_2$                | 2739.1  | 534.62   |
| 252 | $\text{SnO} < \text{---} > \text{Sn} + 0.5 \text{O}_2$              | 2871.1  | 246.37   |
| 253 | $\text{SbO} < \text{---} > \text{Sb} + 0.5 \text{O}_2$              | 31935   | 7043.2   |
| 254 | $\text{Sb}_2\text{O}_3 < \text{---} > 2 \text{Sb} + 1.5 \text{O}_2$ | 2864.4  | 606.9    |
| 255 | $\text{Sb}_4\text{O}_6 < \text{---} > 4 \text{Sb} + 3 \text{O}_2$   | 2734.7  | 1279.9   |

|     |                                                                      |         |         |
|-----|----------------------------------------------------------------------|---------|---------|
| 256 | $\text{CeO}_2 < \text{---} > \text{Ce} + \text{O}_2$                 | 5424.1  | 951.45  |
| 257 | $\text{CeO} < \text{---} > \text{Ce} + 0.5 \text{O}_2$               | -1258.3 | 181.39  |
| 258 | $\text{Pr}_7\text{O}_{12} < \text{---} > 7 \text{Pr} + 6 \text{O}_2$ | 5740.6  | 5412.4  |
| 259 | $\text{PrO}_2 < \text{---} > \text{Pr} + \text{O}_2$                 | 7551.1  | 288.06  |
| 260 | $\text{Pr}_2\text{O}_3 < \text{---} > 2 \text{Pr} + 1.5 \text{O}_2$  | 6701    | 1400.1  |
| 261 | $\text{CsO}_2 < \text{---} > \text{Cs} + \text{O}_2$                 | 2100.6  | 214     |
| 262 | $\text{Cs}_2\text{O} < \text{---} > 2 \text{Cs} + 0.5 \text{O}_2$    | 2758.5  | 259.26  |
| 263 | $\text{LaO} < \text{---} > \text{La} + 0.5 \text{O}_2$               | -1256.1 | 159.57  |
| 264 | $\text{La}_2\text{O}_3 < \text{---} > 2 \text{La} + 1.5 \text{O}_2$  | 6647.6  | 1598.3  |
| 265 | $\text{Tb}_2\text{O}_3 < \text{---} > 2 \text{Tb} + 1.5 \text{O}_2$  | 5993.1  | 2457.9  |
| 266 | $\text{TbO}_2 < \text{---} > \text{Tb} + \text{O}_2$                 | 5136.7  | 838.39  |
| 267 | $\text{TbO}_{1.72} < \text{---} > \text{Tb} + 0.86 \text{O}_2$       | 6449.7  | 676.01  |
| 268 | $\text{TbO}_{1.81} < \text{---} > \text{Tb} + 0.905 \text{O}_2$      | 5627.5  | 841.93  |
| 269 | $\text{ThO}_2 < \text{---} > \text{Th} + \text{O}_2$                 | 6215.9  | 1171.2  |
| 270 | $\text{ThO} < \text{---} > \text{Th} + 0.5 \text{O}_2$               | -366.19 | 43.927  |
| 271 | $\text{U}_4\text{O}_9 < \text{---} > 4 \text{U} + 4.5 \text{O}_2$    | 5787.6  | 4325.2  |
| 272 | $\text{UO}_2 < \text{---} > \text{U} + \text{O}_2$                   | 7480    | 773.49  |
| 273 | $\text{Pu}_2\text{O}_3 < \text{---} > 2 \text{Pu} + 1.5 \text{O}_2$  | 4.2962  | -3411.2 |
| 274 | $\text{PuO}_2 < \text{---} > \text{Pu} + \text{O}_2$                 | 6475.1  | 856.79  |
| 275 | $\text{PuO} < \text{---} > \text{Pu} + 0.5 \text{O}_2$               | 6307.5  | 496.57  |
| 276 | $\text{Ta}_2\text{O}_5 < \text{---} > 2 \text{Ta} + 2.5 \text{O}_2$  | 5359.3  | 1719.8  |
| 277 | $\text{TaO}_2 < \text{---} > \text{Ta} + \text{O}_2$                 | -2047.9 | 429.39  |
| 278 | $\text{TaO} < \text{---} > \text{Ta} + 0.5 \text{O}_2$               | 2384.2  | -175.79 |
| 279 | $\text{W}_2\text{O}_6 < \text{---} > 2 \text{W} + 3 \text{O}_2$      | 4192.8  | 1243.5  |
| 280 | $\text{W}_4\text{O}_{12} < \text{---} > 4 \text{W} + 6 \text{O}_2$   | 3692.1  | 2900.6  |
| 281 | $\text{W}_3\text{O}_9 < \text{---} > 3 \text{W} + 4.5 \text{O}_2$    | 3827.7  | 2112.9  |
| 282 | $\text{W}_3\text{O}_8 < \text{---} > 3 \text{W} + 4 \text{O}_2$      | 3883.9  | 1820.5  |
| 283 | $\text{WO}_{2.72} < \text{---} > \text{W} + 1.36 \text{O}_2$         | 3328.1  | 712.03  |
| 284 | $\text{WO}_{2.9} < \text{---} > \text{W} + 1.45 \text{O}_2$          | 3301.7  | 750.79  |
| 285 | $\text{WO}_{2.96} < \text{---} > \text{W} + 1.48 \text{O}_2$         | 3302    | 764.57  |
| 286 | $\text{WO}_2 < \text{---} > \text{W} + \text{O}_2$                   | 3250.1  | 601.72  |
| 287 | $\text{WO} < \text{---} > \text{W} + 0.5 \text{O}_2$                 | 5279.7  | -309.93 |
| 288 | $\text{WO}_3 < \text{---} > \text{W} + 1.5 \text{O}_2$               | 3686.3  | 711.58  |
| 289 | $\text{ReO}_3 < \text{---} > \text{Re} + 1.5 \text{O}_2$             | 2168.6  | 539.15  |
| 290 | $\text{ReO}_2 < \text{---} > \text{Re} + \text{O}_2$                 | 2319.3  | 415.47  |
| 291 | $\text{Re}_2\text{O}_7 < \text{---} > 2 \text{Re} + 3.5 \text{O}_2$  | 2777    | 1006.8  |
| 292 | $\text{IrO}_2 < \text{---} > \text{Ir} + \text{O}_2$                 | 1311.5  | 226.02  |
| 293 | $\text{IrO}_3 < \text{---} > \text{Ir} + 1.5 \text{O}_2$             | 26.102  | 47.791  |
| 294 | $\text{Ti}_4\text{O}_7 < \text{---} > 4 \text{Ti} + 3.5 \text{O}_2$  | 6417.8  | 2812    |
| 295 | $\text{Pb}_3\text{O}_4 < \text{---} > 3 \text{Pb} + 2 \text{O}_2$    | 1803.8  | 653.75  |
| 296 | $\text{BeO} < \text{---} > \text{Be} + 0.5 \text{O}_2$               | 8481.4  | 405.64  |
| 297 | $\text{MgO} < \text{---} > \text{Mg} + 0.5 \text{O}_2$               | 5725.6  | 486.51  |
| 298 | $\text{Sc}_2\text{O}_3 < \text{---} > 2 \text{Sc} + 1.5 \text{O}_2$  | 6839.4  | 1608.6  |
| 299 | $\text{NiO} < \text{---} > \text{Ni} + 0.5 \text{O}_2$               | 2577.6  | 196.57  |
| 300 | $\text{ZnO} < \text{---} > \text{Zn} + 0.5 \text{O}_2$               | 3492.8  | 280.17  |
| 301 | $\text{Y}_2\text{O}_3 < \text{---} > 2 \text{Y} + 1.5 \text{O}_2$    | 5998.4  | 1985.2  |
| 302 | $\text{PdO} < \text{---} > \text{Pd} + 0.5 \text{O}_2$               | 1045.9  | 115.33  |
| 303 | $\text{Ag}_2\text{O} < \text{---} > 2 \text{Ag} + 0.5 \text{O}_2$    | 425.45  | 30.527  |



|     |                                                                                            |        |          |
|-----|--------------------------------------------------------------------------------------------|--------|----------|
| 304 | $\text{CdO} < \text{---} > \text{Cd} + 0.5 \text{O}_2$                                     | 2411.2 | 247.77   |
| 305 | $\text{TeO}_2 < \text{---} > \text{Te} + \text{O}_2$                                       | 1765.1 | 274.45   |
| 306 | $\text{TeO} < \text{---} > \text{Te} + 0.5 \text{O}_2$                                     | 1117.1 | -44.591  |
| 307 | $\text{CsO} < \text{---} > \text{Cs} + 0.5 \text{O}_2$                                     | 1271.3 | -50.874  |
| 308 | $\text{Cs}_2\text{O}_3 < \text{---} > 2 \text{Cs} + 1.5 \text{O}_2$                        | 2160.9 | 419.78   |
| 309 | $\text{HfO}_2 < \text{---} > \text{Hf} + \text{O}_2$                                       | 7903.6 | 848.26   |
| 310 | $\text{Ce}_2\text{O}_3 < \text{---} > 2 \text{Ce} + 1.5 \text{O}_2$                        | 7385.9 | 1596.4   |
| 311 | $\text{PrO}_{1.833} < \text{---} > \text{Pr} + 0.9165 \text{O}_2$                          | 60388  | 1.55E+05 |
| 312 | $\text{Nd}_2\text{O}_3 < \text{---} > 2 \text{Nd} + 1.5 \text{O}_2$                        | 5939.6 | 1824.6   |
| 313 | $\text{Sm}_2\text{O}_3 < \text{---} > 2 \text{Sm} + 1.5 \text{O}_2$                        | 5033   | 2452.5   |
| 314 | $\text{Eu}_2\text{O}_3 < \text{---} > 2 \text{Eu} + 1.5 \text{O}_2$                        | 5797.4 | 1371.6   |
| 315 | $\text{Gd}_2\text{O}_3 < \text{---} > 2 \text{Gd} + 1.5 \text{O}_2$                        | 5415.9 | 2576.2   |
| 316 | $\text{Dy}_2\text{O}_3 < \text{---} > 2 \text{Dy} + 1.5 \text{O}_2$                        | 6512   | 1638.3   |
| 317 | $\text{Ho}_2\text{O}_3 < \text{---} > 2 \text{Ho} + 1.5 \text{O}_2$                        | 6029.3 | 1900.7   |
| 318 | $\text{Er}_2\text{O}_3 < \text{---} > 2 \text{Er} + 1.5 \text{O}_2$                        | 6204.4 | 1813.5   |
| 319 | $\text{Tm}_2\text{O}_3 < \text{---} > 2 \text{Tm} + 1.5 \text{O}_2$                        | 5851.8 | 1936.5   |
| 320 | $\text{Yb}_2\text{O}_3 < \text{---} > 2 \text{Yb} + 1.5 \text{O}_2$                        | 5993.7 | 1814.3   |
| 321 | $\text{Lu}_2\text{O}_3 < \text{---} > 2 \text{Lu} + 1.5 \text{O}_2$                        | 5916.6 | 1901.6   |
| 322 | $\text{PtO}_2 < \text{---} > \text{Pt} + \text{O}_2$                                       | 28.433 | 27.12    |
| 323 | $\text{Au}_2\text{O}_3 < \text{---} > 2 \text{Au} + 1.5 \text{O}_2$                        | 41.723 | 30.735   |
| 324 | $\text{HgO} < \text{---} > \text{Hg} + 0.5 \text{O}_2$                                     | 724.85 | 145.56   |
| 325 | $\text{Tl}_2\text{O}_3 < \text{---} > 2 \text{Tl} + 1.5 \text{O}_2$                        | 1355   | 379.15   |
| 326 | $\text{Tl}_2\text{O} < \text{---} > 2 \text{Tl} + 0.5 \text{O}_2$                          | 4319.1 | 27.197   |
| 327 | $\text{Bi}_2\text{O}_3 < \text{---} > 2 \text{Bi} + 1.5 \text{O}_2$                        | 29387  | 13995    |
| 328 | $\text{NpO}_2 < \text{---} > \text{Np} + \text{O}_2$                                       | 5433.3 | 964.47   |
| 329 | $\text{Al}(\text{OH})_3 < \text{---} > 0.5 \text{Al}_2\text{O}_3 + 1.5 \text{H}_2\text{O}$ | 317.67 | 75.328   |
| 330 | $\text{Ba}(\text{OH})_2 < \text{---} > \text{BaO} + \text{H}_2\text{O}$                    | 1319.9 | 100.64   |
| 331 | $\text{Be}(\text{OH})_2 < \text{---} > \text{BeO} + \text{H}_2\text{O}$                    | 353.74 | 52.118   |
| 332 | $\text{Cd}(\text{OH})_2 < \text{---} > \text{CdO} + \text{H}_2\text{O}$                    | 388.8  | 77.2     |
| 333 | $\text{Ca}(\text{OH})_2 < \text{---} > \text{CaO} + \text{H}_2\text{O}$                    | 794.14 | 99.377   |
| 334 | $\text{CsOH} < \text{---} > 0.5 \text{Cs}_2\text{O} + 0.5 \text{H}_2\text{O}$              | 3816.5 | 147.59   |
| 335 | $\text{Co}(\text{OH})_2 < \text{---} > \text{CoO} + \text{H}_2\text{O}$                    | 368.26 | 59.09    |
| 336 | $\text{Cu}(\text{OH})_2 < \text{---} > \text{CuO} + \text{H}_2\text{O}$                    | 312.75 | 44.949   |
| 337 | $\text{Cs}_2(\text{OH})_2 < \text{---} > \text{Cs}_2\text{O} + \text{H}_2\text{O}$         | 3566.3 | 298.64   |
| 338 | $\text{Li}_2(\text{OH})_2 < \text{---} > \text{Li}_2\text{O} + \text{H}_2\text{O}$         | 30.956 | 320.97   |
| 339 | $\text{K}_2(\text{OH})_2 < \text{---} > \text{K}_2\text{O} + \text{H}_2\text{O}$           | 2902.8 | 161.22   |
| 340 | $\text{Na}_2(\text{OH})_2 < \text{---} > \text{Na}_2\text{O} + \text{H}_2\text{O}$         | 32.987 | 134.33   |
| 341 | $\text{Fe}(\text{OH})_2 < \text{---} > \text{FeO} + \text{H}_2\text{O}$                    | 341.17 | 54.436   |
| 342 | $\text{Fe}(\text{OH})_3 < \text{---} > 0.5 \text{Fe}_2\text{O}_3 + 1.5 \text{H}_2\text{O}$ | 218.04 | 47.351   |
| 343 | $\text{LiOH} < \text{---} > 0.5 \text{Li}_2\text{O} + 0.5 \text{H}_2\text{O}$              | 1312.5 | 25.64    |
| 344 | $\text{Mg}(\text{OH})_2 < \text{---} > \text{MgO} + \text{H}_2\text{O}$                    | 540.99 | 77.818   |
| 345 | $\text{KOH} < \text{---} > 0.5 \text{K}_2\text{O} + 0.5 \text{H}_2\text{O}$                | 3530.1 | 99.207   |
| 346 | $\text{NaOH} < \text{---} > 0.5 \text{Na}_2\text{O} + 0.5 \text{H}_2\text{O}$              | 2264.4 | 93.979   |
| 347 | $\text{Sr}(\text{OH})_2 < \text{---} > \text{SrO} + \text{H}_2\text{O}$                    | 1013.6 | 89.44    |
| 348 | $\text{BaCO}_3 < \text{---} > \text{BaO} + \text{CO}_2$                                    | 1811.1 | 212.36   |
| 349 | $\text{CdCO}_3 < \text{---} > \text{CdO} + \text{CO}_2$                                    | 567.85 | 96.308   |
| 350 | $\text{CaCO}_3 < \text{---} > \text{CaO} + \text{CO}_2$                                    | 1169   | 166.55   |
| 351 | $\text{Cs}_2\text{CO}_3 < \text{---} > \text{Cs}_2\text{O} + \text{CO}_2$                  | 4045.1 | 149.68   |

|     |                                                                           |        |         |
|-----|---------------------------------------------------------------------------|--------|---------|
| 352 | $\text{Pb}_2\text{CO}_4 < \text{---} > 2\text{PbO} + \text{CO}_2$         | 611.28 | 82.83   |
| 353 | $\text{FeCO}_3 < \text{---} > \text{FeO} + \text{CO}_2$                   | 412.68 | 75.133  |
| 354 | $\text{PbCO}_3 < \text{---} > \text{PbO} + \text{CO}_2$                   | 583.52 | 83.031  |
| 355 | $\text{Li}_2\text{CO}_3 < \text{---} > \text{Li}_2\text{O} + \text{CO}_2$ | 1884.8 | 190.13  |
| 356 | $\text{MgCO}_3 < \text{---} > \text{MgO} + \text{CO}_2$                   | 580.58 | 98.803  |
| 357 | $\text{MnCO}_3 < \text{---} > \text{MnO} + \text{CO}_2$                   | 618.73 | 112.59  |
| 358 | $\text{NiCO}_3 < \text{---} > \text{NiO} + \text{CO}_2$                   | 370.68 | 60.904  |
| 359 | $\text{K}_2\text{CO}_3 < \text{---} > \text{K}_2\text{O} + \text{CO}_2$   | 13.946 | -867.91 |
| 360 | $\text{Rb}_2\text{CO}_3 < \text{---} > \text{Rb}_2\text{O} + \text{CO}_2$ | 5.8455 | -772.73 |
| 361 | $\text{Ag}_2\text{CO}_3 < \text{---} > \text{Ag}_2\text{O} + \text{CO}_2$ | 487.22 | 79.348  |
| 362 | $\text{Na}_2\text{CO}_3 < \text{---} > \text{Na}_2\text{O} + \text{CO}_2$ | 5.332  | -751.22 |
| 363 | $\text{SrCO}_3 < \text{---} > \text{SrO} + \text{CO}_2$                   | 1432.2 | 199.1   |
| 364 | $\text{ZnCO}_3 < \text{---} > \text{ZnO} + \text{CO}_2$                   | 393.48 | 68.277  |

---

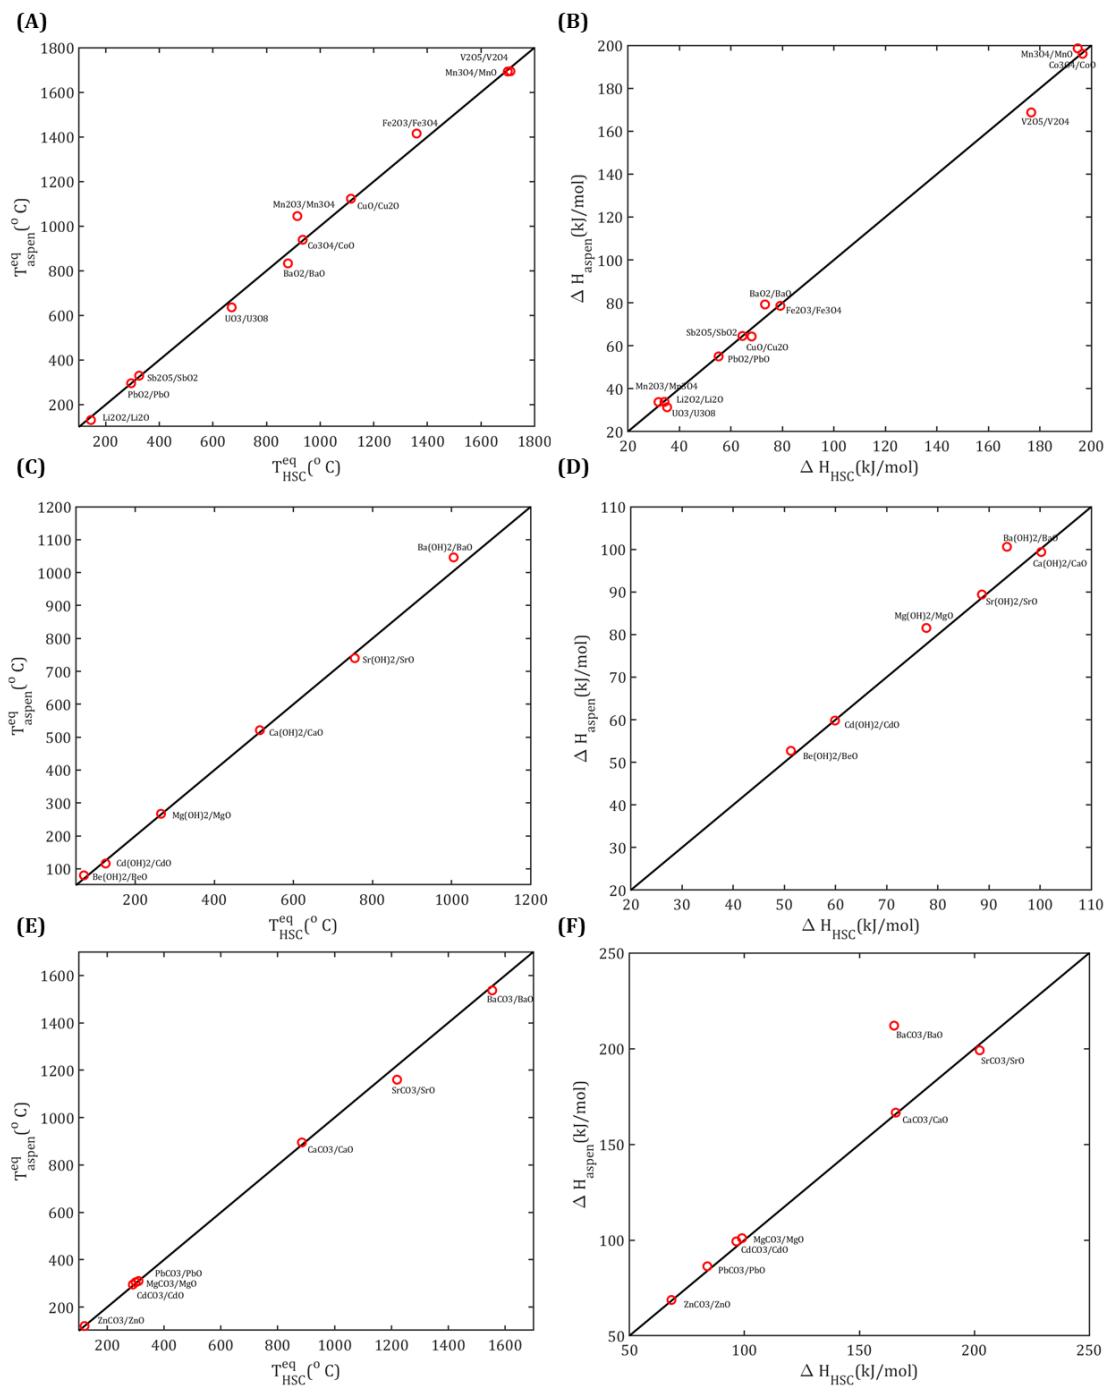

Figure S1. Comparison of the estimated equilibrium temperature and reaction enthalpy with those obtained by Pardo et al. [1] for select redox (A-B), hydroxide (C-D), and carbonate reaction (E-F) systems.

## S2 Reactions obtained after thermodynamic screening

Table S2 lists the reactions obtained after thermodynamic screening and properties including equilibrium temperature, reaction enthalpy, average heat capacities of A and B, and densities of A and B. Average heat capacity of A ( $\overline{Cp}_A$ ) is estimated as follows:

$$\overline{Cp}_A = \frac{\int_{T^L}^{T^U} Cp_A(T) dT}{T^U - T^L}$$

where  $Cp_A(T)$  is the heat capacity of A as a function of temperature,  $T^L = \max(T^{eq} - 500, 250)$  and  $T^U = \min(1750, T^{eq} + 500)$ .

Table S2. List of reactions obtained after performing thermodynamic screening and their corresponding properties.

| No. | Reactions                                                       | $T^{eq}$<br>(K) | $\Delta H^r$<br>(kJ/mol) | $\overline{Cp}_A$ (kJ/<br>kg-K) | $\overline{Cp}_B$ (kJ<br>/kg-K) | $\rho_A$ (g/<br>cm <sup>3</sup> ) | $\rho_B$ (g/<br>cm <sup>3</sup> ) | Price<br>(\$/MT) |
|-----|-----------------------------------------------------------------|-----------------|--------------------------|---------------------------------|---------------------------------|-----------------------------------|-----------------------------------|------------------|
| 1   | Mn <sub>2</sub> O <sub>3</sub> /Mn <sub>3</sub> O <sub>4</sub>  | 1174.1          | 32.136                   | 0.908                           | 0.870                           | 4.72                              | 4.59                              | 1837             |
| 2   | Mn <sub>2</sub> O <sub>3</sub> /MnO                             | 1646.7          | 173.85                   | 1.002                           | 0.820                           | 4.72                              | 5.19                              | 1837             |
| 3   | MnO <sub>2</sub> /Mn <sub>2</sub> O <sub>3</sub>                | 717.69          | 39.764                   | 0.815                           | 0.789                           | 4.01                              | 4.72                              | 2270             |
| 4   | MnO <sub>2</sub> /Mn <sub>3</sub> O <sub>4</sub>                | 809.44          | 56.15                    | 0.837                           | 0.792                           | 4.01                              | 4.59                              | 2270             |
| 5   | BaO <sub>2</sub> /BaO                                           | 1015.3          | 80.479                   | 0.516                           | 0.372                           | 5.39                              | 5.75                              | 1364             |
| 6   | CuO/Cu <sub>2</sub> O                                           | 1304.9          | 64.907                   | 0.725                           | 0.627                           | 5.94                              | 6.03                              | 6220             |
| 7   | Fe <sub>2</sub> O <sub>3</sub> /Fe <sub>3</sub> O <sub>4</sub>  | 1613.1          | 77.754                   | 0.898                           | 0.868                           | 5.07                              | 4.95                              | 805              |
| 8   | MnO <sub>2</sub> /MnO                                           | 1178.7          | 131.17                   | 0.900                           | 0.784                           | 4.01                              | 5.19                              | 2270             |
| 9   | Pb <sub>3</sub> O <sub>4</sub> /PbO                             | 638.72          | 57.949                   | 0.278                           | 0.135                           | 8.22                              | 8.47                              | 8500             |
| 10  | UO <sub>3</sub> /U <sub>3</sub> O <sub>8</sub>                  | 860.96          | 34.881                   | 0.344                           | 0.361                           | 6.57                              | 8.3                               | 77093            |
| 11  | UO <sub>3</sub> /U <sub>4</sub> O <sub>9</sub>                  | 1340.3          | 98.232                   | 0.364                           | 0.362                           | 6.57                              | 10.97                             | 77093            |
| 12  | UO <sub>3</sub> /UO <sub>2</sub>                                | 1544.4          | 139.18                   | 0.369                           | 0.336                           | 6.57                              | 11.26                             | 77093            |
| 13  | Na <sub>2</sub> O <sub>2</sub> /Na <sub>2</sub> O               | 1141.2          | 87.077                   | 1.454                           | 1.565                           | 2.52                              | 2.35                              | 150              |
| 14  | NaO <sub>2</sub> /Na <sub>2</sub> O                             | 632.37          | 46.146                   | 1.602                           | 1.387                           | 2.19                              | 2.35                              | 150              |
| 15  | Co <sub>3</sub> O <sub>4</sub> /CoO                             | 1166.1          | 197.78                   | 0.967                           | 0.775                           | 5.4                               | 6.31                              | 36132            |
| 16  | KO <sub>2</sub> /K <sub>2</sub> O <sub>2</sub>                  | 1158.8          | 22.337                   | 1.304                           | 0.195                           | 2.22                              | 2.31                              | 436              |
| 17  | TcO <sub>3</sub> /TcO <sub>2</sub>                              | 1227            | 42.06                    | 1.435                           | 0.622                           | 3.64                              | 6.58                              | 60000000         |
| 18  | PrO <sub>2</sub> /Pr <sub>7</sub> O <sub>12</sub>               | 690.92          | 13.759                   | 0.532                           | 0.416                           | 6.12                              | 6.08                              | 52200            |
| 19  | Pr <sub>7</sub> O <sub>12</sub> /Pr <sub>2</sub> O <sub>3</sub> | 1131.4          | 186.46                   | 0.458                           | 0.453                           | 6.08                              | 6.09                              | 52200            |
| 20  | PrO <sub>2</sub> /Pr <sub>2</sub> O <sub>3</sub>                | 947.26          | 35.203                   | 0.576                           | 0.437                           | 6.12                              | 6.09                              | 52200            |
| 21  | CsO <sub>2</sub> /Cs <sub>2</sub> O                             | 1452.7          | 85.226                   | 0.696                           | 0.405                           | 3.73                              | 4.05                              | 2227600          |
| 22  | TbO <sub>2</sub> /Tb <sub>2</sub> O <sub>3</sub>                | 765.24          | 39.378                   | 0.398                           | 0.367                           | 7.74                              | 7.84                              | 501000           |
| 23  | TbO <sub>1.72</sub> /Tb <sub>2</sub> O <sub>3</sub>             | 931.21          | 20.02                    | 0.412                           | 0.381                           | 7.78                              | 7.84                              | 501000           |
| 24  | TbO <sub>1.81</sub> /Tb <sub>2</sub> O <sub>3</sub>             | 928.46          | 28.928                   | 0.410                           | 0.381                           | 7.8                               | 7.84                              | 501000           |
| 25  | TbO <sub>2</sub> /TbO <sub>1.72</sub>                           | 641.59          | 18.716                   | 0.390                           | 0.382                           | 7.74                              | 7.78                              | 501000           |
| 26  | TbO <sub>1.81</sub> /TbO <sub>1.72</sub>                        | 922.33          | 8.891                    | 0.409                           | 0.411                           | 7.8                               | 7.78                              | 501000           |
| 27  | Rh <sub>2</sub> O <sub>3</sub> /Rh                              | 1304.3          | 332.07                   | 0.637                           | 0.333                           | 7.97                              | 12.03                             | 72000000         |
| 28  | IrO <sub>2</sub> /Ir                                            | 1311.5          | 226.02                   | 0.376                           | 0.165                           | 11.3                              | 21.93                             | 43000000         |
| 29  | PdO/Pd                                                          | 1045.9          | 115.33                   | 0.467                           | 0.283                           | 7.79                              | 11.41                             | 33000000         |
| 30  | Ba(OH) <sub>2</sub> /BaO                                        | 1319.9          | 100.64                   | 0.822                           | 0.388                           | 4.46                              | 5.75                              | 1981             |
| 31  | Ca(OH) <sub>2</sub> /CaO                                        | 794.14          | 99.377                   | 1.519                           | 0.917                           | 2.2                               | 3.29                              | 150              |
| 32  | LiOH/Li <sub>2</sub> O                                          | 1312.5          | 25.64                    | 3.634                           | 3.084                           | 1.4                               | 1.96                              | 15246            |
| 33  | Sr(OH) <sub>2</sub> /SrO                                        | 1013.6          | 89.44                    | 1.216                           | 0.54                            | 3.35                              | 4.88                              | 2111             |

|    |                                      |        |        |       |       |      |      |      |
|----|--------------------------------------|--------|--------|-------|-------|------|------|------|
| 34 | CaCO <sub>3</sub> /CaO               | 1169   | 166.55 | 1.29  | 0.971 | 2.61 | 3.29 | 100  |
| 35 | Pb <sub>2</sub> CO <sub>4</sub> /PbO | 611.28 | 82.83  | 0.385 | 0.139 | 6.87 | 8.47 | 2800 |
| 36 | PbCO <sub>3</sub> /PbO               | 583.52 | 83.031 | 0.492 | 0.144 | 6.27 | 8.47 | 2800 |
| 37 | MgCO <sub>3</sub> /MgO               | 580.58 | 98.803 | 1.302 | 1.159 | 2.9  | 3.47 | 242  |
| 38 | MnCO <sub>3</sub> /MnO               | 618.73 | 112.59 | 0.970 | 0.713 | 3.56 | 5.19 | 1837 |
| 39 | SrCO <sub>3</sub> /SrO               | 1432.2 | 199.1  | 0.935 | 0.572 | 3.48 | 4.88 | 863  |

### S3 Power cycle

We employ supercritical CO<sub>2</sub> Brayton cycle with a simple recuperative configuration consisting of a compressor, turbine, recuperator, heater/reactor, and cooler. The schematic of the cycle and temperature-entropy diagram of the cycle is shown in Figure S2.

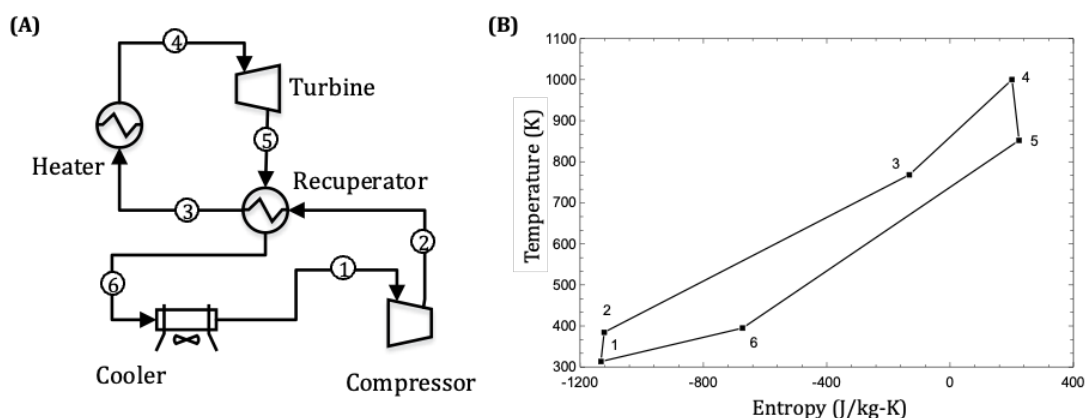

Figure S2. Schematic of s-CO<sub>2</sub> Brayton cycle with a simple recuperative configuration. (B) T-S diagram of the s-CO<sub>2</sub> power cycle.

### S4 Model equations

An optimization model is developed to assess the economic viability of various reactions. The objective of the model is to minimize the levelized cost of electricity. The constraints of the plant include performance considerations of plant components, mass and energy balances, equipment design, and cost calculations. Based on Figures 1 and 2, we develop process models for the three reactions. However, for the sake of brevity, process model for carbonate reactions employing closed configuration (Figure S3) is provided in this section.

#### Notation

We denote indices by lower-case italic roman characters, variables as upper-case italic roman characters, and sets and subsets by upper-case bold roman characters. The parameters are denoted by italic Greek characters.

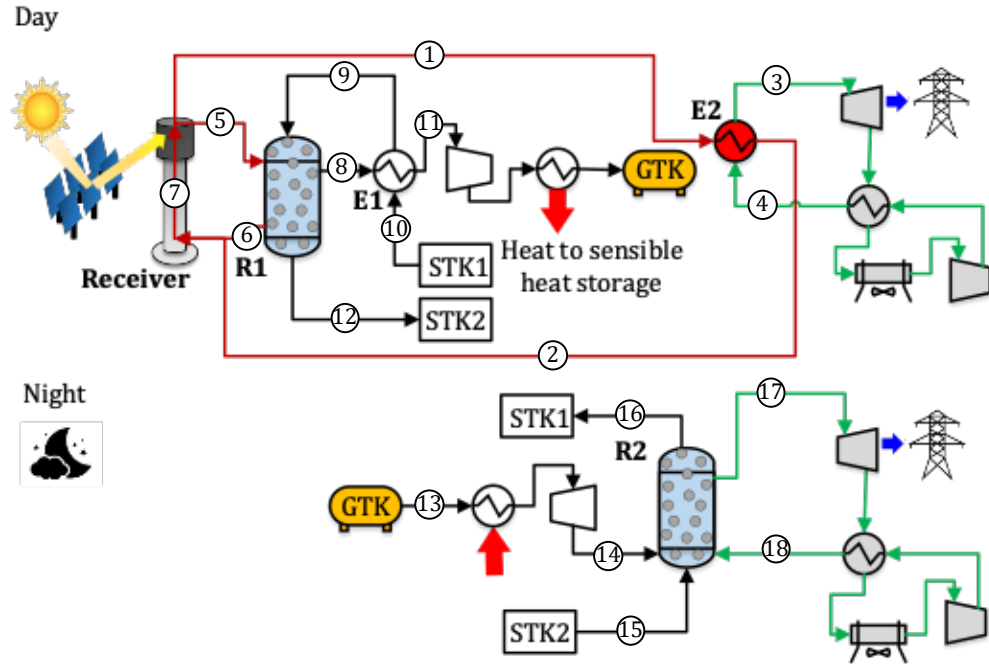

Figure S3. Process flowsheet for carbonate reactions.

### Sets and Subsets

|                               |                                       |
|-------------------------------|---------------------------------------|
| $i \in \mathbf{I}$            | Units                                 |
| $\mathbf{I}^R$                | Reaction units                        |
| $\mathbf{I}^{TK}$             | Storage tanks                         |
| $j \in \mathbf{J}$            | Streams                               |
| $\mathbf{JPS}_i^{\text{IN}}$  | Inlet process streams to unit $i$     |
| $\mathbf{JS}_i^C$             | Streams containing C from/to unit $i$ |
| $\mathbf{JPS}_i^{\text{OUT}}$ | Outlet process streams from unit $i$  |
| $\mathbf{JUS}_i^{\text{IN}}$  | Inlet utility streams to unit $i$     |
| $\mathbf{JUS}_i^{\text{OUT}}$ | Outlet utility streams from unit $i$  |
| $k \in \mathbf{K}$            | Components                            |
| $\mathbf{K}^R$                | Components involved in reaction       |
| $\mathbf{K}^F$                | Components in fluid phase             |
| $s \in \mathbf{S}$            | Scenarios                             |

### Parameters

|              |                                                   |
|--------------|---------------------------------------------------|
| $\omega_k$   | Molecular weight of component $k$ (g/mol)         |
| $\nu_k$      | Stoichiometry coefficient of component $k$        |
| $Cp_k$       | Specific heat capacity of component $k$ (kJ/kg/K) |
| $T^{eq}$     | Equilibrium temperature (K)                       |
| $T^{amb}$    | Ambient temperature (K)                           |
| $\Delta H^r$ | Reaction enthalpy at $T^{eq}$ (kJ/kg)             |
| $\delta^e$   | External tube diameter in reactors (m)            |

|                      |                                                                                |
|----------------------|--------------------------------------------------------------------------------|
| $\delta^{in}$        | Internal tube diameter in reactors (m)                                         |
| $\delta^{dc}$        | Distance between tube centers in reactors (m)                                  |
| $\gamma$             | Reaction conversion                                                            |
| $\rho_k$             | Density of material $k$ (kg/m <sup>3</sup> )                                   |
| $\epsilon^r$         | Void fraction in reactor                                                       |
| $\epsilon^{stk}$     | Void fraction in solid storage tanks                                           |
| $\zeta^t$            | Thermal conductivity of tube wall (W/m/K)                                      |
| $\zeta_k^f$          | Thermal conductivity of fluid $k \in \mathbf{K}^F$ (W/m/K)                     |
| $\mu_k$              | Viscosity of component $k \in \mathbf{K}^F$ (kg/m/s)                           |
| $\sigma$             | Stefan-Boltzmann constant (W/m <sup>2</sup> /K <sup>4</sup> )                  |
| $\xi$                | Convective heat transfer coefficient of air (W/m <sup>2</sup> /K)              |
| $\xi^{HTC}$          | Heat transfer coefficient in E1 (W/m <sup>2</sup> /K)                          |
| $\psi^t$             | Emissivity of tube surface                                                     |
| $\psi^b$             | Emissivity of bed                                                              |
| $\phi^{col}$         | concentration ratio of collector                                               |
| $\alpha^{rec}$       | receiver solar absorptance                                                     |
| $\psi^{rec}$         | receiver thermal emittance                                                     |
| $\lambda^{CRF}$      | Capital recovery factor                                                        |
| $v_s$                | Solar direct normal irradiance in scenario $s$ (kW/m <sup>2</sup> )            |
| $\theta^{conv}$      | Conveyor unit power consumption (kW/kg/s)                                      |
| $\phi^C$             | Sensible heat of cooling of gas from $\tau^{eq}$ to 298 K (kJ/kg)              |
| $\phi^{comp}$        | Compression power to compress CO <sub>2</sub> from 1 bar to 75 bar (MW/kg/s)   |
| $\lambda^{indirect}$ | Indirect cost factor                                                           |
| $\lambda^{cont}$     | Contingency cost factor                                                        |
| $\theta^{rate}$      | CSP plant rated capacity (MW)                                                  |
| $\theta^{rec,ref}$   | Reference size of receiver (MWh <sub>t</sub> )                                 |
| $\delta^T$           | Minimum approach temperature during heat transfer (K)                          |
| $\kappa_s^{day}$     | Duration of daytime in scenario $s$ (h)                                        |
| $\kappa_s^{night}$   | Duration of nighttime in scenario $s$ (h)                                      |
| $\beta^{rec}$        | Scaling factor of receiver                                                     |
| $\eta^{col}$         | Collector efficiency                                                           |
| $\eta^{bop}$         | Balance of plant efficiency (0.9, considering 10% parasitic load in the plant) |
| $\lambda^{col}$      | Collector price (\$/m <sup>2</sup> )                                           |
| $\lambda^{conv}$     | Conveyor price (\$/MW)                                                         |
| $\lambda^{E1}$       | Price of E1 (\$/m <sup>2</sup> )                                               |
| $\lambda^{comp}$     | Compressor price (\$/MW)                                                       |
| $\lambda^{sens}$     | Sensible heat storage price (\$/MWh <sub>t</sub> )                             |
| $\lambda^{rec}$      | Receiver price at size $\theta^{r,ref}$ (\$/MWh <sub>t</sub> )                 |
| $\lambda^p$          | Power block price (\$/MW)                                                      |
| $\lambda^{reactor}$  | Reactor price (\$/m <sup>2</sup> of heat exchange area)                        |

|                     |                                                    |
|---------------------|----------------------------------------------------|
| $\lambda^{sm}$      | Storage media price (\$/ton)                       |
| $\lambda^{stk}$     | Solid storage tank price (\$/m <sup>3</sup> )      |
| $\lambda^{gtk}$     | Gas storage tank price (\$/m <sup>3</sup> )        |
| $\lambda^{om,fix}$  | Operation and maintenance, fixed cost (\$/MW/year) |
| $\lambda^{om,vary}$ | Operation and maintenance, variable cost (\$/MWh)  |
| $\pi_s$             | Occurrence frequency of scenario $s$               |

### First stage variables

|            |                                                                                                           |
|------------|-----------------------------------------------------------------------------------------------------------|
| $A^{col}$  | Collector area (m <sup>2</sup> )                                                                          |
| $A_i^r$    | Heat exchange area of reactor $i \in \mathbf{I}^R$ (m <sup>2</sup> )                                      |
| $A^{E1}$   | Heat exchange area of E1 (m <sup>2</sup> )                                                                |
| $CAPEX$    | Plant total capital cost (\$)                                                                             |
| $C^{conv}$ | Conveyor cost (\$)                                                                                        |
| $C^{comp}$ | Compressor cost (\$)                                                                                      |
| $C^{sen}$  | Sensible heat storage cost (\$)                                                                           |
| $C^{TCES}$ | TCES system cost (\$)                                                                                     |
| $LCOE$     | Levelized cost of electricity (¢/kWh)                                                                     |
| $M^{sm}$   | Storage media weight (ton)                                                                                |
| $OPEX$     | Annual operational cost (\$/year)                                                                         |
| $QT^{rec}$ | Receiver size (MWh <sub>t</sub> )                                                                         |
| $V_i$      | Volume of unit $i \in \mathbf{I}^R \cup \{STK1, STK2\}$ (m <sup>3</sup> )                                 |
| $L_i$      | Length of unit $i \in \mathbf{I}^R$ (m)                                                                   |
| $W^{ele}$  | Annual total electricity output (MWh/year)                                                                |
| $T_j$      | Temperature of stream $j$ (K)                                                                             |
| $TP_i$     | Pinch temperature in unit $i \in \mathbf{I}^R$                                                            |
| $AMTD_i$   | Average mean temperature difference between hot and cold streams in unit $i \in \mathbf{I}^R \cup E1$ (K) |

### Second stage variables

|             |                                                                                                                                                             |
|-------------|-------------------------------------------------------------------------------------------------------------------------------------------------------------|
| $F_{j,k,s}$ | Mass flow rate of component $k$ in stream $j$ under scenario $s$ (kg/sec)                                                                                   |
| $Q_{i,s}$   | Heat transfer rate in unit $i \in \mathbf{I}^R \cup E1$ under scenario $s$ (MW)                                                                             |
| $QS_s$      | Sensible heat stored under scenarios $s$ (MWh)                                                                                                              |
| $TO_{i,s}$  | Average temperature of tube surface on the bed side of unit $i \in \mathbf{I}^R$ under scenario $s$                                                         |
| $H_{i,s}$   | Overall heat transfer coefficient of unit $i \in \mathbf{I}^R$ under scenario $s$ (W/m <sup>2</sup> /K)                                                     |
| $HO_{i,s}$  | Heat transfer coefficient of fluidized bed in unit $i \in \mathbf{I}^R$ under scenario $s$ (W/m <sup>2</sup> /K)                                            |
| $HI_{i,s}$  | Convection heat transfer coefficient between tube surface and HTF in unit $i \in \mathbf{I}^R$ under scenario $s$ (W/m <sup>2</sup> /K)                     |
| $SRT_{i,s}$ | Solid residence time in unit $i \in \mathbf{I}^R$ under scenario $s$ (sec)                                                                                  |
| $U_{j,s}$   | Superficial velocity of stream $j \in \mathbf{JUS}_i^{IN} \cup \mathbf{JUS}_i^{OUT} \cup \mathbf{JS}_i^C$ , $i \in \mathbf{I}^R$ under scenario $s$ (m/sec) |
| $XB_{j,s}$  | Mole fraction of stream $j \in \mathbf{JPS}_i^{OUT}$ , $i \in \mathbf{I}^R$ under scenario $s$ (m/sec)                                                      |



|                               |                                                                        |
|-------------------------------|------------------------------------------------------------------------|
| $W_s^{day}$                   | Daytime power generated under scenario $s$ (MWh)                       |
| $W_s^{night}$                 | Nighttime power generated under scenario $s$ (MWh)                     |
| $P_s^{conv}$                  | Conveyor power under scenario $s$ (MW)                                 |
| $P_s^{comp}$                  | Compressor power under scenario $s$ (MW)                               |
| $QT_s^{curtail}$              | Energy curtailed through heliostat defocus under scenario $s$ (MWh)    |
| $Q_s^{HTF}$                   | HTF thermal energy requirement during charging under scenario $s$ (MW) |
| $DT_s^c$                      | Duration of daytime power generation (h)                               |
| $NT_s^d$                      | Duration of nighttime power generation (h)                             |
| $E_s^{rec}$                   | Receiver efficiency in scenario $s$                                    |
| $E_s^{p,day} / E_s^{p,night}$ | Daytime/ nighttime power block efficiency in scenario $s$              |

### Equations

$$F_{j,k,s} = 0, \forall i \in \mathbf{I}, j \in \mathbf{JUS}_i^{\text{IN}} \cup \mathbf{JUS}_i^{\text{OUT}}, k \in \mathbf{K}^{\text{R}}, s \in \mathbf{S} \quad (1)$$

$$F_{7,k,s} = F_{5,k,s} + F_{1,k,s}, \forall k \in \mathbf{K}, s \in \mathbf{S} \quad (2)$$

$$T_1 = T_5 \quad (3)$$

$$T_5 \geq T_7 + 100 \quad (4)$$

$$F_{7,k,s} = F_{2,k,s} + F_{6,k,s}, \forall k \in \mathbf{K}, s \in \mathbf{S} \quad (5)$$

$$TP_i \geq T_j + \delta^T, \forall i = \text{R1}, j \in \mathbf{JPS}_i^{\text{OUT}}, s \in \mathbf{S} \quad (6)$$

$$TP_i + \delta^T \leq T_j, \forall i = \text{R2}, j \in \mathbf{JPS}_i^{\text{OUT}}, s \in \mathbf{S} \quad (7)$$

$$T_5 \geq T_8 + \delta^T \quad (8)$$

$$T_6 \geq T_9 + \delta^T \quad (9)$$

$$\sum_{j \in \mathbf{JUS}_i^{\text{IN}}} F_{j,k,s} \cdot (T_7 - T_j) = 0, \forall k \in \mathbf{K}, i = \text{Rec}, s \in \mathbf{S} \quad (10)$$

$$E_s^{rec} = \alpha^{rec} - \frac{\psi^{rec} \cdot \sigma \cdot (T_1^4) + \xi \cdot (T_1 - T^{amb})}{v_s \cdot \eta^{col} \cdot \phi^{col}}, \forall s \in \mathbf{S} \quad (11)$$

$$F_{j,k,s} = F_{j',k,s}, \forall i = \text{E1} \cup \mathbf{I}^{\text{R}}, j' \in \mathbf{JUS}_i^{\text{IN}}, j \in \mathbf{JUS}_i^{\text{OUT}}, k = \mathbf{K}, s \in \mathbf{S} \quad (12)$$

$$10^3 \cdot Q_{i,s} = \sum_k F_{7,k,s} \cdot Cp_k \cdot (T_5 - T_7), \forall i = \text{Rec}, s \in \mathbf{S} \quad (13)$$

$$10^3 \cdot Q_{i,s} = \sum_k F_{10,k,s} \cdot Cp_k \cdot (T_9 - T_{10}), \forall i = \text{E1}, s \in \mathbf{S} \quad (14)$$

$$T_8 \geq T_9 + \delta^T \quad (15)$$

$$T_{11} \geq T_{10} + \delta^T \quad (16)$$

$$10^3 \cdot Q_{i,s} = \sum_k F_{8,k,s} \cdot (T_8 - T_{11}), \forall i = \text{E1}, s \in \mathbf{S} \quad (17)$$

$$AMTD_i = \frac{T_8 + T_{11} - T_9 - T_{10}}{2}, \forall i = \text{E1} \quad (18)$$

$$A^{E1} \cdot \xi^{HTC} \cdot AMTD_{E1} \geq Q_{E1,s}, \forall s \in \mathbf{S} \quad (19)$$

$$(F_{j,B,s} - F_{j',B,s}) \cdot \nu_k \cdot \omega_k = (F_{j,k,s} - F_{j',k,s}) \cdot \nu_B \cdot \omega_B, \forall i \in \mathbf{I}^R, j \in \mathbf{JPS}_i^{\text{OUT}}, j' \in \mathbf{JPS}_i^{\text{IN}}, k \in \mathbf{K}, s \in \mathbf{S} \quad (20)$$

$$F_{j,A,s} = (1 - \gamma) \cdot F_{j',A,s}, \forall i = R1, j \in \mathbf{JPS}_i^{\text{OUT}}, j' \in \mathbf{JPS}_i^{\text{IN}}, s \in \mathbf{S} \quad (21)$$

$$F_{j,B,s} = (1 - \gamma) \cdot F_{j',B,s}, \forall i = R2, j \in \mathbf{JPS}_i^{\text{OUT}}, j' \in \mathbf{JPS}_i^{\text{IN}}, s \in \mathbf{S} \quad (22)$$

$$F_{j,k,s} = F_{j',k,s}, \forall i \in \mathbf{I}^R, j \in \mathbf{JUS}_i^{\text{OUT}}, j' \in \mathbf{JUS}_i^{\text{IN}}, k \in \mathbf{K}, s \in \mathbf{S} \quad (23)$$

$$10^3 \cdot Q_{i,s} = (-F_{j,A,s} + F_{j',A,s}) \cdot \Delta H^r + \sum_{k \in \mathbf{K}^R} [F_{j,k,s} \cdot Cp_k \cdot (T_j - T^{eq}) + F_{j',k,s} \cdot Cp_k \cdot (T^{eq} - T_{j'})], \forall i \in \mathbf{I}^R, j \in \mathbf{JPS}_i^{\text{OUT}}, j' \in \mathbf{JPS}_i^{\text{IN}}, s \in \mathbf{S} \quad (24)$$

$$10^3 \cdot Q_{i,s} = \sum_k F_{j,k,s} \cdot Cp_k \cdot (T_{j'} - T_j), \forall i \in \mathbf{I}^R, j \in \mathbf{JUS}_i^{\text{OUT}}, j' \in \mathbf{JUS}_i^{\text{IN}}, s \in \mathbf{S} \quad (25)$$

$$A_i^r \cdot AMTD_i \cdot H_{i,s} = 10^6 \cdot Q_{i,s}, \forall i \in \mathbf{I}^R, s \in \mathbf{S} \quad (26)$$

$$V_i = \frac{A_i^r \cdot (\delta_i^{dc})^2}{\pi \cdot \delta_i^e}, \forall i \in \mathbf{I}^R \quad (27)$$

$$AMTD_i = \frac{[(T_{j''} + T_{j'''}) - (T_j + T_{j'})]}{2}, \forall i \in \mathbf{I}^R, j \in \mathbf{JPS}_i^{\text{OUT}}, j' \in \mathbf{JPS}_i^{\text{IN}}, j'' \in \mathbf{JUS}_i^{\text{OUT}}, j''' \in \mathbf{JUS}_i^{\text{IN}} \quad (28)$$

$$\frac{1}{HI_{i,s}} = \frac{1}{HO_{i,s}} + \frac{\delta^e - \delta^{in}}{2\zeta^t} + \frac{\delta^e}{\delta^{in} \cdot HI_{i,s}}, \forall i \in \mathbf{I}^R, s \in \mathbf{S} \quad (29)$$

$$HO_{i,s} = \frac{0.66 \cdot \zeta_k^f}{\delta^e} \left( \frac{Cp_k \cdot \mu_k}{\zeta_k^f} \right)^{0.3} \left[ \left( \frac{U_{j',s} \cdot \rho_k \cdot \delta^e}{\mu_k} \right) \cdot \left( \frac{XB_{j,s} \cdot \rho_B + (1 - XB_{j,s}) \cdot \rho_A}{\rho_k} \right) \cdot \left( \frac{1 - \epsilon^r}{\epsilon^r} \right) \right]^{0.44} + \quad (30)$$

$$\frac{\sigma \cdot (TO_{i,s}^4 - T_j^4)}{\left( \frac{1}{\psi^b} + \frac{1}{\psi^t} - 1 \right) \cdot (TO_{i,s} - T_j)}, \forall i \in \mathbf{I}^R, j \in \mathbf{JPS}_i^{\text{OUT}}, j' \in \mathbf{JPS}_i^{\text{C}}, k \in \mathbf{K}, s \in \mathbf{S}$$

$$\frac{HI_{i,s} \cdot \delta^{in}}{\zeta_k^f} = 0.023 \cdot \left( \frac{Cp_k \cdot \mu_k}{\zeta_k^f} \right)^{0.4} \left( \frac{U_{j,s} \cdot \rho_k \cdot \delta^{in}}{\mu_k} \right)^{0.8}, \forall i = R1, j \in \mathbf{JUS}_i^{\text{OUT}}, k \in \mathbf{K}, s \in \mathbf{S} \quad (31)$$

$$\frac{HI_{i,s} \cdot \delta^{in}}{\zeta_k^f} = 0.023 \cdot \left( \frac{Cp_k \cdot \mu_k}{\zeta_k^f} \right)^{0.3} \left( \frac{U_{j,s} \cdot \rho_k \cdot \delta^{in}}{\mu_k} \right)^{0.8}, \forall i = R2, j \in \mathbf{JUS}_i^{\text{OUT}}, k \in \mathbf{K}, s \in \mathbf{S} \quad (32)$$

$$TO_{i,s} = \frac{T_j + T_{j'}}{2} - \frac{10^6 \cdot Q_{i,s}}{A_i^r} \cdot \left( \frac{\delta^e}{\delta^{in} \cdot HI_{i,s}} + \frac{\delta^e - \delta^{in}}{2\zeta^t} \right), \forall i \in \mathbf{I}^R, j \in \mathbf{JUS}_i^{\text{OUT}}, j' \in \mathbf{JUS}_i^{\text{IN}}, s \in \mathbf{S} \quad (33)$$

$$10^3 \cdot V_{R1} = \frac{F_{9,A,s} \cdot SRT_{R1,s}}{\rho_A \cdot (1 - \epsilon^r)}, \forall s \in \mathbf{S} \quad (34)$$

$$10^3 \cdot V_{R2} = \frac{F_{15,B,s} \cdot SRT_{R2,s}}{\rho_B \cdot (1 - \epsilon^r)}, \forall s \in \mathbf{S} \quad (35)$$

$$U_{j,s} = \frac{F_{j,k,s}}{\rho k \cdot A_i^T \left[ \frac{(\delta^{dc})^2}{\pi \delta^e \cdot L_i} - \frac{\delta^e}{4L_i} \right]}, \forall i \in \mathbf{I}^R, j \in \mathbf{JS}_i^C, k \in \mathbf{K}, s \in \mathbf{S} \quad (36)$$

$$U_{j,s} = \frac{F_{j,k,s}}{\rho k \cdot A_i^T \left[ \frac{(\delta^{in})^2}{4 \cdot \delta^e \cdot L_i} \right]}, \forall i \in \mathbf{I}^R, j \in \mathbf{JUS}_i^{\text{IN}} \cup \mathbf{JUS}_i^{\text{OUT}}, k \in \mathbf{K}, s \in \mathbf{S} \quad (37)$$

$$TO_{i,s} \geq \frac{T_j + T_{j'}}{2}, \forall i \in \mathbf{R1}, j \in \mathbf{JPS}_i^{\text{OUT}}, j' \in \mathbf{JPS}_i^{\text{IN}}, s \in \mathbf{S} \quad (38)$$

$$TO_{i,s} \leq \frac{T_j + T_{j'}}{2}, \forall i \in \mathbf{R2}, j \in \mathbf{JPS}_i^{\text{OUT}}, j' \in \mathbf{JPS}_i^{\text{IN}}, s \in \mathbf{S} \quad (39)$$

$$\frac{10^3 \cdot Q_{i,s} \cdot (T_{j'} - TP_i)}{(T_{j'} - T_j)} = (-F_{j,A,s} + F_{j',A,s}) \cdot \Delta H^r + \sum_{j'' \in \mathbf{JP}_i^{\text{OUT}}} \sum_k F_{j'',k,s} \cdot Cp_k \cdot (T_{j''} - T^{eq}), \quad (40)$$

$$\forall i = \mathbf{R1}, j \in \mathbf{JUS}_i^{\text{OUT}}, j' \in \mathbf{JUS}_i^{\text{IN}}, s \in \mathbf{S}$$

$$\frac{10^3 \cdot Q_{i,s} \cdot (T_j - TP_i)}{(T_{j'} - T_j)} = \sum_{j'' \in \mathbf{JP}_i^{\text{IN}}} \sum_k F_{j'',k,s} \cdot Cp_k \cdot (T_{j''} - T_{j'''}), \quad (41)$$

$$\forall i = \mathbf{R2}, j \in \mathbf{JUS}_i^{\text{OUT}}, j' \in \mathbf{JUS}_i^{\text{IN}}, j''' \in \mathbf{JPS}_i^{\text{OUT}}, s \in \mathbf{S}$$

$$T_1 = T_3 + \delta^T \quad (42)$$

$$T_2 = T_4 + \delta^T \quad (43)$$

$$E^{p,day} = -0.25 \cdot \left( \frac{T_3}{1000} \right)^2 + 0.87 \cdot \left( \frac{T_3}{1000} \right) - 0.15 \quad (44)$$

$$E^{p,night} = -0.25 \cdot \left( \frac{T_{17}}{1000} \right)^2 + 0.87 \cdot \left( \frac{T_{17}}{1000} \right) - 0.15 \quad (45)$$

$$T_j = 0.87 \cdot T_{j'} - 98.3, \forall i = \{E2, R2\}, j \in \mathbf{JUS}_i^{\text{IN}}, j' \in \mathbf{JUS}_i^{\text{OUT}} \quad (46)$$

$$10^3 \cdot Q_{i,s} = \sum_k F_{1,k,s} \cdot Cp_k \cdot (T_1 - T_2), \forall i = E2, s \in \mathbf{S} \quad (47)$$

$$Q_{i,s} \cdot E^{p,day} \cdot \eta^{bop} = \theta^{rate} \quad (48)$$

$$DT_s^c \leq \kappa_s^{day}, \forall s \in \mathbf{S} \quad (49)$$

$$NT_s^d \leq \kappa_s^{night}, \forall s \in \mathbf{S} \quad (50)$$

$$F_{12,k,s} \cdot DT_s^c = F_{15,k,s} \cdot NT_s^d, \forall k \in \mathbf{K}, s \in \mathbf{S} \quad (51)$$

$$F_{10,k,s} \cdot DT_s^c = F_{16,k,s} \cdot NT_s^d, \forall k \in \mathbf{K}, s \in \mathbf{S} \quad (52)$$

$$Q_{R2,s} \cdot E_s^{p,night} \cdot \eta^{bop} = \theta^{rate}, \forall s \in \mathbf{S} \quad (53)$$

$$Q_s^{HTF} = \theta^{rate} / E^{p,day} / \eta^{bop} + Q_{R1,s}, \forall s \in \mathbf{S} \quad (54)$$

$$QT^{rec} \cdot E_s^{rec} \cdot \kappa_s^{day} \geq Q_s^{HTF} \cdot DT_s^c, \forall s \in \mathbf{S} \quad (55)$$

$$A^{col} \cdot v_s \cdot \eta^{col} \cdot E_s^{rec} \cdot \kappa_s^{day} = Q_s^{HTF} \cdot DT_s^c + QT_s^{curtail}, \forall s \in \mathbf{S} \quad (56)$$

$$P_s^{conv} = \theta^{conv} \cdot \sum_k F_{2,k,s}, \forall s \in \mathbf{S} \quad (57)$$

$$C^{conv} \geq \lambda^{conv} \cdot P_s^{conv}, \quad \forall s \in \mathbf{S} \quad (58)$$

$$V_{STK1} \geq \frac{DT_s^c}{(1 - \epsilon^{stk})} \cdot \sum_k \frac{F_{1,k,s}}{\rho_k}, \forall s \in \mathbf{S} \quad (59)$$

$$V_{STK2} \geq \frac{DT_s^c}{(1 - \epsilon^{stk})} \cdot \sum_k \frac{F_{2,k,s}}{\rho_k}, \forall s \in \mathbf{S} \quad (60)$$

$$V_{GTK} \geq \frac{F_{11,C,s} \cdot DT_s^c}{\rho_C} \quad (61)$$

$$T_{10} = T_{16}, T_{12} = T_{15} \quad (62)$$

$$QS_s = F_{11,k,s} \cdot DT_s^c \cdot (\phi^C + Cp_k \cdot (T_{13} - T^{eq})), \forall k = C, s \in \mathbf{S} \quad (63)$$

$$P_s^{comp} = 2 \cdot F_{11,k,s} \cdot \phi^{comp}, \forall k = C, s \in \mathbf{S} \quad (64)$$

$$C^{sen} \geq \lambda^{sen} \cdot QS_s, \forall s \in \mathbf{S} \quad (65)$$

$$C^{comp} \geq \lambda^{comp} \cdot P_s^{comp}, \forall s \in \mathbf{S} \quad (66)$$

$$C^{E1} \geq \lambda^{E1} \cdot A^{E1} \quad (67)$$

$$M^{sm} \geq \sum_k F_{2,k,s} \cdot (SRT_{R1,s} + DT_s^c) + F_{11,k,s} \cdot SRT_{R2,s} \quad (68)$$

$$C^{TCES} = \lambda^{reactor} \cdot \sum_{i \in \mathbf{R}} A_i^r + \lambda^{stk} \cdot (V_{STK1} + V_{STK2}) + \lambda^{stk} \cdot V_{GTK} + C^{conv} + \lambda^{sm} \cdot M^{sm} + C^{sen} + C^{comp} + C^{E1} \quad (69)$$

$$CAPEX = [\lambda^{col} \cdot A^{col} + \lambda^{rec} \cdot \theta^{rec,ref} \cdot \left( \frac{QT^{rec}}{\theta^{rec,ref}} \right)^{\beta^{rec}} + C^{TCES} + \frac{\lambda^p \cdot \theta^{rate}}{\eta^{bop}}] \cdot (1 + \lambda^{indirect}) \cdot (1 + \lambda^{cont}) \quad (70)$$

$$OPEX = \lambda^{om,fix} \cdot \theta^{rate} + \lambda^{om,vary} \cdot W^{ele} \quad (71)$$

$$W_s^{day} = (\theta^{rate} - P_s^{conv}) \cdot DT_s^c, \forall s \in \mathbf{S} \quad (72)$$

$$W_s^{night} = \theta^{rate} \cdot NT_s^d, \forall s \in \mathbf{S} \quad (73)$$

$$W^{ele} = 365 \cdot \sum_s \pi_s \cdot (W_s^{day} + W_s^{night}) \quad (74)$$

$$LCOE = (CAPEX \cdot CRF + OPEX) / W^{ele} \quad (75)$$

Eq. (1) sets the flow of the reaction components in the utility streams to 0. Eq. (2) states that the component flow rates of stream 7 are equal to the sum of streams 1 and 5. Eq. (3) sets the temperature of streams 1 and 5 to be the same. Eq. (4) indicates that the temperature of the stream exiting the receiver should be at least 100 K higher than the temperature of the inlet stream. Eq. (5) is the component mass balance on the streams entering the receiver. Eq. (6-9) specify the difference between pinch and stream temperatures for the heat transfer to occur in the reactors. Eq. (10) states

that the enthalpy of mixing is 0. Eq. (11) relates the receiver efficiency with the temperature. Eq. (12) states that the mass of utility entering the unit E1 and reactor units equals the mass exiting. Eqs. (13) and (14) determine the heat duty of the receiver and E1, respectively. Eqs. (15) and (16) set the temperature difference between the streams entering and exiting E1 for heat transfer to occur. Eq. (17) and (18) define the heat duty and average mean temperature difference (AMTD), respectively. Eq. (19) relates the heat exchange area, heat transfer coefficient, and AMTD with the heat duty of E1. Eqs. (20-23) models the mass balance of the reaction components and utilities in the reactors. Eqs. (24) and (25) compute the heat exchanged in the reactors. Eq. (26) relates the heat exchange area in the reactors, heat transfer coefficient, and AMTD with the heat exchanged. Eq. (27) relates the reactor volume with the heat exchange area of the reactors. Eq. (28) defines the AMTD of the streams associated with the reactors. The overall heat transfer coefficient between solids and HTF/WF is estimated using Eqs. (29-33). Eqs. (34) and (35) relate the reactor volume with the residence time. Eqs. (36) and (37) estimate the flow rate of C and HT/WF in the reactors with the respective flow rates. Eqs. (38) and (39) specify the relationship between the average temperature of the tube surface and the inlet and outlet process stream temperatures. Eqs. (40) and (41) relate the pinch temperature with the heat exchanged in the reactors.

Eqs. (42) and (43) set the minimum temperature difference between the stream for heat transfer. Eqs. (44) and (45) relate the efficiency of the power block to temperature. Eq. (46) specifies the relationship between the inlet and outlet WF temperature of E2 and R2. Eq. (47) estimates the heat exchanged in E2 and the corresponding power produced in given by eq. (48). Eqs. (49) and (50) relate the charging and discharging duration with sun and night hours, respectively. Eqs (51) and (52) are the mass balance equations on TK1 and TK2.

Eq. (53) relates the heat exchanged in R2 with the power produced. Eq. (54) states that the heat transferred to HTF during charging is the sum of heat transferred to R1 and E2. Eq. (55) estimates the receiver size based on the heat exchanged. Eq. (56) states that the energy the collector receives is equal to the sum of heat exchanged in the receiver and curtailed. Eq. (57) estimates the power needed by the conveyor to transport solids and eq. (58) computes the capital cost of the conveyor. Eqs. (59-61) relate the volume of storage tanks with the discharging time, flow rates, density, and void fraction. Eq. (62) states that the temperature of the solids entering the storage tanks equals that of the solids exiting. Eq. (63) estimates the sensible heat stored by gas C. Eq. (64) estimates the power consumed by the compressor. Eq. (65), (66), and (67) compute the capital costs of sensible heat storage unit, compressor, and heat exchanger E1, respectively.

Eq. (68) estimates the total material required. Eq. (69) states that the total cost of thermochemical energy storage is the sum of reactor, storage tanks, conveyor, material, sensible heat storage, compressor, and heat exchanger costs. Eqs. (70) and (71) estimate the total capital expenditure and operating costs. Eq. (72) and (73) compute the total electricity produced during day and night, respectively. Eq. (74) estimates the total electricity produced in a year. Eq. (75) relates LCOE with the annual costs and the total electricity produced.

Table S3. Parameter values [2–5].

| Parameter            | Values                                                                             | Parameter           | Values                                                       |
|----------------------|------------------------------------------------------------------------------------|---------------------|--------------------------------------------------------------|
| $\delta^e$           | 0.034                                                                              | $\lambda^{cont}$    | 0.07                                                         |
| $\delta^{in}$        | 0.049                                                                              | $\theta^{rate}$     | 100                                                          |
| $\delta^{dc}$        | 0.118                                                                              | $\theta^{rec,ref}$  | 670                                                          |
| $\lambda^{indirect}$ | 0.26                                                                               | $\delta^T$          | 10                                                           |
| $\kappa_s^{day}$     | s1: 3.9, s2: 5.2, s3: 6.8, s4:<br>7.8, s5: 9.6, s6: 11.1                           | $\epsilon^r$        | 0.7                                                          |
| $\epsilon^{stk}$     | 0.5                                                                                | $\phi^{comp}$       | 0.36                                                         |
| $\zeta^t$            | 18.6                                                                               | $\beta^{rec}$       | 0.7                                                          |
| $\zeta_k^f$          | s-CO <sub>2</sub> : 0.075, CO <sub>2</sub> : 0.092                                 | $\eta^{col}$        | 0.6                                                          |
| $\mu_k$              | s-CO <sub>2</sub> : $4.3 \times 10^{-5}$ , CO <sub>2</sub> :<br>$4 \times 10^{-5}$ | $\eta^{bop}$        | 0.9                                                          |
| $\sigma$             | $5.7 \times 10^{-8}$                                                               | $\lambda^{col}$     | 150                                                          |
| $\xi$                | 10                                                                                 | $\lambda^{conv}$    | $10^6$                                                       |
| $\xi^{HTC}$          | 50                                                                                 | $\lambda^{E1}$      | $10^3$                                                       |
| $\psi^t$             | 0.9                                                                                | $\lambda^{comp}$    | $10^6$                                                       |
| $\psi^b$             | 0.9                                                                                | $\lambda^{sens}$    | $3 \times 10^4$                                              |
| $\phi^{col}$         | 1200                                                                               | $\lambda^{rec}$     | $1.75 \times 10^5$                                           |
| $\alpha^{rec}$       | 0.95                                                                               | $\lambda^p$         | $1.2 \times 10^6$                                            |
| $\psi^{rec}$         | 0.85                                                                               | $\lambda^{reactor}$ | 500                                                          |
| $\lambda^{CRF}$      | 0.1                                                                                | $\lambda^{stk}$     | 1800                                                         |
| $v_s$                | s1: 0.27, s2: 0.6, s3: 0.74,<br>s4: 0.89, s5: 0.94, s6: 0.97                       | $\pi_s$             | s1: 0.04, s2: 0.08, s3: 0.11,<br>s4: 0.24, s5: 0.3, s6: 0.22 |
| $\theta^{conv}$      | 0.0504                                                                             | $\lambda^{om,fix}$  | $6.5 \times 10^4$                                            |
| $\lambda^{gk}$       | 100                                                                                | $\lambda^{om,vary}$ | 3.5                                                          |

## S5 Solution strategy

The process model is nonlinear consisting of non-convex terms and the existing solvers (e.g., BARON [6], ANTIGONE [7], etc.) could not solve it to global optimality. Accordingly, we develop a solution strategy, which is based on the observation that by fixing the temperature of streams 1 ( $T_1$ ) and 16 ( $T_{16}$ ) in Figure S3, the model could be solved quickly to global optimality using BARON. The lower and upper bounds of  $T_1$ , denoted as  $T_1^L$  and  $T_1^U$ , respectively, are determined using:

$$T_1^L = T^{eq} + 10, T_1^U = \min\{1750, T_A^m, T_B^m\}$$

The lower and upper bounds of  $T_{16}$  are determined using:

$$T_{16}^L = T^{eq} - 500, T_{16}^U = T^{eq} - 10$$

Thus, we discretize the range of the two variables to generate grid points (Figure S4A) and solve the model at all the grid points (Figure S4B). The solution of the model corresponds to the grid point for which the minimum LCOE is attained.

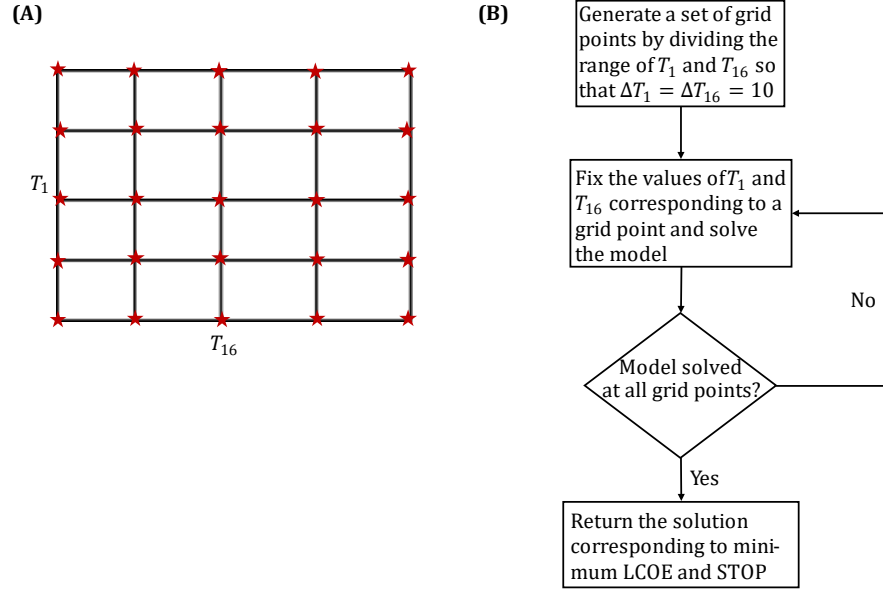

Figure S4. (A) Illustration of the grid points generated by discretizing the range of  $T_1$  and  $T_{16}$ . (B) Solution strategy developed to solve the model to global optimality.

## S6 Derivation of empirical relationships for material property targeting

The properties that are of interest are: reaction enthalpy and entropy, equilibrium temperature, density, heat capacity, and molar weight of the materials involved in the reaction. We begin with stating the Neumann-Kopp rule [8]:

$$Cp_A^m = Cp_B^m + \left(\frac{x-y}{2}\right) \cdot Cp_{O_2}^m \quad (76)$$

where  $Cp_A^m$ ,  $Cp_B^m$ , and  $Cp_{O_2}^m$  are the molar heat capacities of A, B, and  $O_2$ , respectively. The entropy of component  $k$ , denoted by  $S_k$ , is given by:

$$S_k = S_k^\circ + \int_{298}^T \frac{Cp_k^m}{T} dT, k \in \{A, B\} \quad (77)$$

where  $S_k^\circ$  is the entropy of component  $k$  at standard conditions. Using Eqs. (75) and (76), the reaction entropy ( $\Delta S^r$ ) is:

$$\Delta S^r = S_B^\circ - S_A^\circ + \left(\frac{x-y}{2}\right) \cdot S_{O_2}^\circ \quad (78)$$

Using similar arguments, the reaction enthalpy ( $\Delta H^r$ ) is given by:

$$\Delta H^r = H_B^\circ - H_A^\circ + \left(\frac{x-y}{2}\right) \cdot H_{O_2}^\circ \quad (79)$$

where  $H_B^\circ$ ,  $H_A^\circ$ , and  $H_{O_2}^\circ$  are the formation enthalpies of B, A, and  $O_2$ , respectively at standard conditions. Glasser and Jenkins [9,10] related molecular volumes ( $MV_k$ ) with heat capacity, standard entropy, and density as follows:

$$Cp_k = \kappa_{Cp} \cdot MV_k + \gamma_{Cp}, \forall k \in \{A, B\} \quad (80)$$

$$S_k^\circ = \kappa_S \cdot MV_k + \gamma_S, \forall k \in \{A, B\} \quad (81)$$

$$\rho_k = \frac{\omega_k}{602.2 \cdot MV_k}, \forall k \in \{A, B\} \quad (82)$$

By relating a single variable (molecular volume) with heat capacity, standard entropy, and density, the correlations between the properties are established. The bounds on the property values are imposed and they correspond to the minimum and maximum values of the properties of existing materials. Equations for molar weight balance and the stoichiometry coefficient for gas C are as follows:

$$\omega_A = \omega_B + \nu_C \cdot \omega_C \quad (83)$$

$$\nu_C = \frac{x - y}{2} \quad (84)$$

The optimal material properties, design, and operating conditions are obtained by solving the optimization model formed by including Eqs. 1-75 and Eqs. 78-84.

## S7 Optimization results for Fe<sub>2</sub>O<sub>3</sub>/Fe<sub>3</sub>O<sub>4</sub> system

The solution of the optimization model yields the design and operational decisions that lead to minimum LCOE. In this section, we present the results for the Fe<sub>2</sub>O<sub>3</sub>/Fe<sub>3</sub>O<sub>4</sub> system. The optimal design decisions are given in Table S4. The values of operating variables are given in Table S5-S6. The detailed energy flows are shown in Figure S5.

Table S4. Optimal design decisions for Fe<sub>2</sub>O<sub>3</sub>/Fe<sub>3</sub>O<sub>4</sub> system.

| Heliostat            | Receiver | R1<br>Volume       | R2<br>Volume       | R1 Heat<br>Exchange<br>area | R2 Heat<br>Exchange<br>area | Tank<br>TK1         | Tank<br>TK2         | Sensible<br>storage for C |
|----------------------|----------|--------------------|--------------------|-----------------------------|-----------------------------|---------------------|---------------------|---------------------------|
| 1.33 km <sup>2</sup> | 752 MW   | 316 m <sup>3</sup> | 424 m <sup>3</sup> | 3539 m <sup>2</sup>         | 4759 m <sup>2</sup>         | 4952 m <sup>3</sup> | 4903 m <sup>3</sup> | 127 MWh                   |

Table S5. Stream temperatures (K) for Fe<sub>2</sub>O<sub>3</sub>/Fe<sub>3</sub>O<sub>4</sub> system based on flowsheet in Figure S3.

| Day                                   |      | Night    |      |
|---------------------------------------|------|----------|------|
| $T_1 = T_5$                           | 1675 | $T_{13}$ | 298  |
| $T_2$                                 | 1360 | $T_{14}$ | 1342 |
| $T_3$                                 | 1665 | $T_{16}$ | 1233 |
| $T_4$                                 | 1350 | $T_{17}$ | 1332 |
| $T_6$                                 | 1605 | $T_{18}$ | 1060 |
| $T_7$                                 | 1553 |          |      |
| $T_8 = T_{11} = T_{12}$<br>$= T_{15}$ | 1623 |          |      |
| $T_9 = T_{10}$                        | 1245 |          |      |



Table S6. Storage charging and discharging hours in the six scenarios for  $\text{Fe}_2\text{O}_3/\text{Fe}_3\text{O}_4$  system.

| Storage charging (h) |     |     |     |     |      | Storage discharging (h) |     |     |      |      |      |
|----------------------|-----|-----|-----|-----|------|-------------------------|-----|-----|------|------|------|
| 1                    | 2   | 3   | 4   | 5   | 6    | 1                       | 2   | 3   | 4    | 5    | 6    |
| 3.9                  | 5.3 | 6.8 | 7.8 | 9.6 | 11.1 | 0                       | 1.0 | 5.3 | 10.4 | 14.4 | 12.9 |

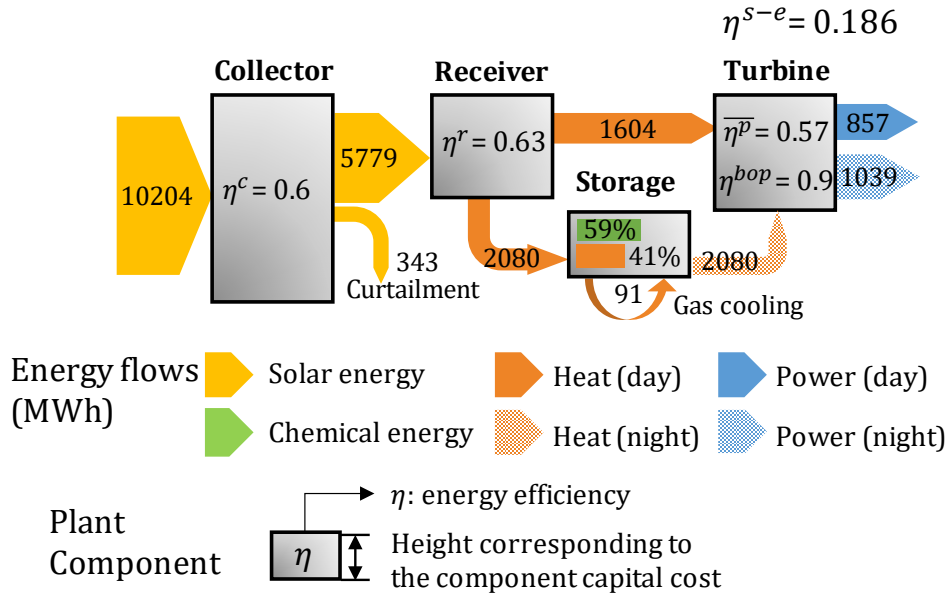

Figure S5. Energy flows and energy efficiencies of CSP-TCES system employing  $\text{Fe}_2\text{O}_3/\text{Fe}_3\text{O}_4$  system. Daily energy flows are scenario-weighted averages. The storage efficiency is assumed to be 100%. The percentages of chemical and sensible energy storage are shown in the storage block.

## S8 Heat transfer process

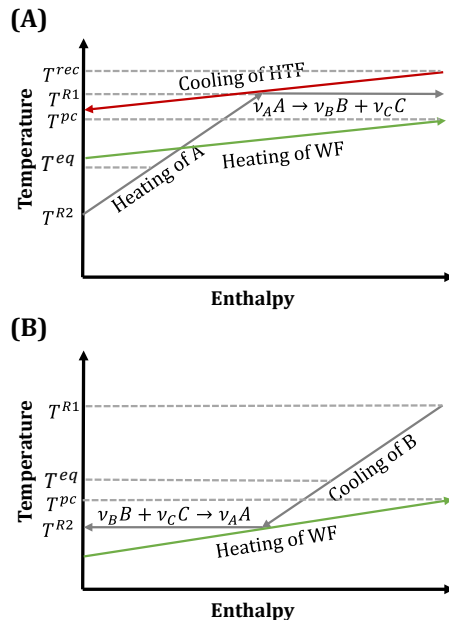

Figure S6. Illustration of heat transfer process during (A) day and (B) night operation.

For the overall system efficiency to be high, it is critical that  $T^{rec}$  should be low,  $T^{pc}$  should be high, and the difference between  $T^{rec}$  and  $T^{pc}$  should be small. The temperature-enthalpy diagram shown in Figure S6 illustrates the heat transfer process and highlights that  $T^{rec} > T^{pc}$  so that the second law of thermodynamics is satisfied. Secondly, a finite difference in  $T^{rec}$  and  $T^{pc}$  will always exist due to heat transfer limitations.

## References

- [1] Pardo P, Deydier A, Anxionnaz-Minvielle Z, Rougé S, Cabassud M, Cognet P. A review on high temperature thermochemical heat energy storage. *Renewable and Sustainable Energy Reviews* 2014;32:591–610. <https://doi.org/10.1016/j.rser.2013.12.014>.
- [2] Turchi CS, Heath GA. Molten Salt Power Tower Cost Model for the System Advisor Model (SAM). 2013.
- [3] Gael D, Ulrich and Palligamai T. Vasudevan. *Chemical Engineering Process Design and Economics: A Practical Guide*. Process Publ.; 2004.
- [4] Peng X, Yao M, Root TW, Maravelias CT. Design and Analysis of Concentrating Solar Power Plants with Fixed-bed Reactors for Thermochemical Energy Storage. *Appl Energy* 2020;262:114543. <https://doi.org/10.1016/j.apenergy.2020.114543>.
- [5] Bayon A, Bader R, Jafarian M, Fedunik-Hofman L, Sun Y, Hinkley J, et al. Techno-economic assessment of solid-gas thermochemical energy storage systems for solar thermal power applications. *Energy* 2018;149:473–84. <https://doi.org/10.1016/j.energy.2017.11.084>.
- [6] Khajavirad A, Sahinidis N v. A hybrid LP/NLP paradigm for global optimization relaxations. *Mathematical Programming Computation* 2018;10:383–421.
- [7] Misener R, Floudas C A. ANTIGONE: Algorithms for coNTinuous / Integer Global Optimization of Nonlinear Equations. *Journal of Global Optimization* 2014;59:503–26.
- [8] Kopp H. Investigations of the specific heat of solid bodies. *Philos Trans R Soc Lond* 1865;155:71–292.
- [9] Glasser L, Donald H, Jenkins B. Predictive thermodynamics for ionic solids and liquids. *Physical Chemistry Chemical Physics* 2016;18:21226. <https://doi.org/10.1039/c6cp00235h>.
- [10] Glasser L, Jenkins HDB. Volume-based thermodynamics: A prescription for its application and usage in approximation and prediction of thermodynamic data. *J Chem Eng Data* 2011;56:874–80.

<https://doi.org/10.1021/JE100683U>.
